# Supplementary material
Source: publisher figshare collection journal article supplement (https://acs.figshare.com/ndownloader/files/25559780)
Supplement: Supplementary file 1 [file 25559780]

## Sheet: Table Legend
Table Legend
Table	Title	Description
Table S-1	List of food habits of ECS in Iran	Prey items recorded in the stomach and fecal contents of 96 live Echis carinatus sochureki speciemens from three different Iranian populations.
Table S-2	Direct BU assessment of ECS venom [Hormozgan (HO) population]	List of proteins with confirmation by data dependent analysis (DDA) mass spectrometry after in-solution tryptic digestion of the whole venom of ECS species of HO population.
Table S-3	Direct BU assessment of ECS venom [South Khorasan (SK) population]	List of proteins with confirmation by data dependent analysis (DDA) mass spectrometry after in-solution tryptic digestion of the whole venom of ECS species of SK population.
Table S-4	Direct BU assessment of ECS venom [Sistan and Bluchestan (SB) population]	List of proteins with confirmation by data dependent analysis (DDA) mass spectrometry after in-solution tryptic digestion of the whole venom of ECS species of SB population.
Table S-5	BU assessment of isolated fractions from ECS venom [Hormozgan (HO) population]	List of proteins with confirmation by data dependent analysis (DDA) mass spectrometry after size exclusion separation of crude venom (HO population) and in-solution tryptic digestion of the isolated fractions.
Table S-6	BU assessment of isolated fractions from ECS venom [South Khorasan (SK) population]	List of proteins with confirmation by data dependent analysis (DDA) mass spectrometry after size exclusion separation of crude venom (SK population) and in-solution tryptic digestion of the isolated fractions.
Table S-7	BU assessment of isolated fractions from ECS venom [Sistan and Bluchestan (SB) population]	List of proteins with confirmation by data dependent analysis (DDA) mass spectrometry after size exclusion separation of crude venom (SB population) and in-solution tryptic digestion of the isolated fractions.
Table S-8	Direct TD assessment of ECS mixed population [Hormozgan (HO), South Khorasan (SK), Sistan and Bluchestan (SB) populations] venom	List of confirmed proteins by data dependent analysis (DDA) mass spectrometry after direct top-down (RP-MS/MS) measurements of reduced and non-reduced form of crude venom (mixed population of ECS species)
Table S-9	TD assessment of isolated fractions from ECS venom [Hormozgan (HO) population]	List of confirmed proteins by data dependent analysis (DDA) mass spectrometry after direct top-down (RP-MS/MS) measurements of reduced and non-reduced form of size exclusion separated venom fractions (HO population of ECS species )
Table S-10	TD assessment of isolated fractions from ECS venom [South Khorasan (SK) population]	List of confirmed proteins by data dependent analysis (DDA) mass spectrometry after direct top-down (RP-MS/MS) measurements of reduced and non-reduced form of size exclusion separated venom fractions (SK population of ECS species )
Table S-11	TD assessment of isolated fractions from ECS venom [Sistan and Bluchestan (SB) population]	List of confirmed proteins by data dependent analysis (DDA) mass spectrometry after direct top-down (RP-MS/MS) measurements of reduced and non-reduced form of size exclusion separated venom fractions (SB population of ECS species )
Table S-12	complete list of identified proteins (TD_mixed venom)	List of proteoforms with four common PTMs in isolated fractions of three population venoms.
Table S-13	complete list of identified proteins (TD_fractions_HO venom)	List of all identified PrSM in isolated fractions of Hormozgan population venom.
Table S-14	complete list of identified proteins (TD_fractions_SB venom)	List of all identified PrSM in isolated fractions of Sistan and baluchestan population venom.
Table S-15	complete list of identified proteins (TD_fractions_SK venom)	List of all identified PrSM in isolated fractions of Hormozgan population venom.
Table S-16	List of modified proteoform (TD_all fractions)	List of proteoforms with four common PTMs in isolated fractions of three population venoms.
Table S-17	List of modified peptides (BU_all fractions)	List of modified tryptic peptides with four common PTMs in isolated fractions of three population venoms.

## Sheet: S-1
Table S1. Prey items identified in the stomach and fecal contents of 96 live Echis carinatus sochureki speciemens from three different Iranian populations.
prey taxon					ECS populations
					HO	SK	SB
					n= 31	n= 19	n= 46
Euarthropoda
	Insecta						n= 4
Arthropoda
	Araneae (spiders)					n= 2
	Scorpiones (scorpions)
		family Buthidae			n= 25	n= 11	n= 37
	Diplopoda (millipedes)					n= 2
Reptilia
	Squamata
		family Lacertidae
			genus Eremias			n= 6	n= 7
		family Gekkonidae					n= 5
			genus Hemidactylus		n= 3
			genus Microgecko		n= 2
			genus Tropiocolotes		n= 5
Amphibia
	Anura (toads)
		family Bufonidae
			genus Bufotes		n= 7	n=4
Aves						n=1
Mammalia
	rodentia					n=1	n=3
HO: Hormozgan; SK: South Khorasan; SB: Sistan&Baluchestan

## Sheet: S-2
Table S2. List of protein identified from Echis carinatus sockureki (IRAN) venom [Hormozgan population (HO)] using the RPLC-MS/MS bottom-up proteomics technique. Whole Ecs_HO venom were directly subjected to RPLC-MS/MS analyses after in-solution tryptic digestion. Protein identifications of bottom-up MS/MS data were accomplished by Proteome Discoverer software (version 2.2) against the Serpentes …
Hormozgan_Crude_BU
	Accession	Description	Organism	# Peptides	# PSMs	# AAs	MW [kDa]	Protein classes
1	W8EFS0	5'-nucleotidase (Fragment)	Macrovipera lebetina	2	4	408	45	5'NTD	5'-nucleotidase
2	Q7T3S7	Acidic phospholipase A2 EC-I	Echis carinatus	3	9	136	15.5	Acidic PLA2	Phospholipase A2
3	Q18DC8	Renin-like aspartic protease	Echis ocellatus	1	3	395	43.8	RLAP	Renin-like aspartic protease
4	P48650	Basic phospholipase A2 homolog ecarpholin S	Echis carinatus	10	89	122	13.8	Basic-PLA2	Phospholipase A2
5	P0DMT4	Cysteine-rich venom protein	Echis carinatus	3	10	220	24.7	CRiSP	Cysteine-rich secretory protein
6	P81017	Snaclec echicetin subunit alpha	Echis carinatus sochureki	2	10	133	15.8	CTL	Snake C-type lectin/lectin-like
7	A0A0A1WDW9	C-type lectin J	Echis coloratus	1	4	158	18.3	CTL	Snake C-type lectin/lectin-like
8	P81798	Snaclec multactivase regulatory subunit (Fragment)	Echis multisquamatus	1	3	29	3.5	CTL	Snake C-type lectin/lectin-like
9	A0A1L8D645	BATXCTL19	Bothrops atrox	1	1	146	17	CTL	Snake C-type lectin/lectin-like
10	Q7T2Q1	Snaclec EMS16 subunit alpha	Echis multisquamatus	1	2	157	18.2	CTL	Snake C-type lectin/lectin-like
11	A0A1I9KNR4	Disintegrin Dis-1	Vipera ammodytes ammodytes	1	8	128	14	Dis	Disintegrin
12	U3TDL2	Glutaminyl_cyclase (Fragment)	Ovophis okinavensis	2	3	369	42.4	GpCT	Glutaminyl-peptide cyclotransferase
13	B5U6Y8	L-amino-acid oxidase	Echis ocellatus	3	14	504	56.5	LAOs	L-amino acid oxidase
14	P0C2D6	L-amino-acid oxidase (Fragment)	Protobothrops mucrosquamatus	2	16	24	2.9	LAOs	L-amino acid oxidase
15	A0A0A1WCY6	Amine oxidase	Echis coloratus	3	14	504	56.7	LAOs	L-amino acid oxidase
16	A0A1L8D615	Amine oxidase	Bothrops atrox	2	8	502	56.6	LAOs	L-amino acid oxidase
17	A0A223PK33	Beta-nerve growth factor	Daboia russelii	1	6	247	27.7	NGF	Nerve growth factor
18	E9JGH4	Metalloproteinase (Fragment)	Echis carinatus sochureki	5	11	248	27.7	P-II SVMP	Snake venom metallopeptidase
19	E9JGG8	Metalloproteinase (Fragment)	Echis carinatus sochureki	3	7	327	36.6	P-II SVMP	Snake venom metallopeptidase
20	E9JGH6	Metalloproteinase	Echis carinatus sochureki	1	4	128	14	P-II SVMP	Snake venom metallopeptidase
21	E9JG38	Metalloproteinase	Echis carinatus sochureki	13	53	607	68.4	P-III SVMP	Snake venom metallopeptidase
22	E9JG29	Metalloproteinase	Echis carinatus sochureki	11	49	607	68.2	P-III SVMP	Snake venom metallopeptidase
23	E9JG33	Metalloproteinase	Echis carinatus sochureki	10	38	618	69.3	P-III SVMP	Snake venom metallopeptidase
24	E9JG35	Metalloproteinase	Echis carinatus sochureki	8	26	615	69.1	P-III SVMP	Snake venom metallopeptidase
25	E9JG45	Metalloproteinase (Fragment)	Echis carinatus sochureki	8	28	276	30.8	P-III SVMP	Snake venom metallopeptidase
26	E9JG30	Metalloproteinase	Echis carinatus sochureki	5	17	612	68.7	P-III SVMP	Snake venom metallopeptidase
27	E9JG32	Metalloproteinase	Echis carinatus sochureki	5	14	412	46.1	P-III SVMP	Snake venom metallopeptidase
28	E9JG42	Metalloproteinase (Fragment)	Echis carinatus sochureki	5	17	255	28.3	P-III SVMP	Snake venom metallopeptidase
29	E9JG26	Metalloproteinase	Echis carinatus sochureki	6	16	607	68.1	P-III SVMP	Snake venom metallopeptidase
30	E9JG39	Metalloproteinase	Echis carinatus sochureki	6	15	610	69.5	P-III SVMP	Snake venom metallopeptidase
31	E9KJZ6	Group III snake venom metalloproteinase (Fragment)	Echis ocellatus	3	7	553	62.6	P-III SVMP	Snake venom metallopeptidase
32	E9JGH1	Metalloproteinase	Echis carinatus sochureki	2	9	472	53.6	P-II SVMP	Snake venom metallopeptidase
33	E9KNB4	Group III snake venom metalloproteinase	Echis carinatus sochureki	2	6	612	68.6	P-III SVMP	Snake venom metallopeptidase
34	E9JG53	Metalloproteinase (Fragment)	Echis carinatus sochureki	2	9	247	27.8	P-III SVMP	Snake venom metallopeptidase
35	Q2UXQ1	Group III snake venom metalloproteinase (Fragment)	Echis ocellatus	3	7	584	65.5	P-III SVMP	Snake venom metallopeptidase
36	E9JG37	Metalloproteinase (Fragment)	Echis carinatus sochureki	2	6	512	57.6	P-III SVMP	Snake venom metallopeptidase
37	E9JGA4	Metalloproteinase	Echis coloratus	2	8	614	68.8	P-III SVMP	Snake venom metallopeptidase
38	Q4VM07	Zinc metalloproteinase-disintegrin-like VLAIP-B	Macrovipera lebetina	2	4	614	68.8	P-III SVMP	Snake venom metallopeptidase
39	A0A194AQ28	Metalloproteinase type III 11	Sistrurus miliarius barbouri	1	1	606	67.7	P-III SVMP	Snake venom metallopeptidase
40	E9JG92	Metalloproteinase	Echis coloratus	1	2	616	69.3	P-III SVMP	Snake venom metallopeptidase
41	A0A194AS35	Metalloproteinase type III 7a	Sistrurus miliarius barbouri	1	1	609	68.4	P-III SVMP	Snake venom metallopeptidase
42	A0A0A1WDU0	Phospholipase B-like	Echis coloratus	1	2	553	64.5	PLB	Phospholipase B
43	E9JG14	Serine protease (Fragment)	Echis carinatus sochureki	4	20	237	26.2	SVSPs	Snake venom serine proteinase
44	E9JG22	Serine protease (Fragment)	Echis carinatus sochureki	2	4	232	25.5	SVSPs	Snake venom serine proteinase
45	A1E237	Venom thrombin-like enzyme (Fragment)	Deinagkistrodon acutus	2	7	235	25.5	SVSPs	Snake venom serine proteinase
46	P81038	Thrombin-like enzyme cerastotin (Fragments)	Cerastes cerastes	1	8	98	11.1	SVSPs	Snake venom serine proteinase
47	A0A0A1WDS7	Serine protease A (Fragment)	Echis coloratus	1	5	90	10.6	SVSPs	Snake venom serine proteinase
48	A0A194AM91	Serine proteinase 1	Agkistrodon piscivorus	1	4	257	28.1	SVSPs	Snake venom serine proteinase
49	T1DEE8	Kallikrein-CohPH-2	Crotalus oreganus helleri	1	5	266	29.9	SVSPs	Snake venom serine proteinase
50	E5L0E3	Alpha-fibrinogenase-like	Daboia siamensis	1	2	258	28.5	SVSPs	Snake venom serine proteinase
51	E9JG01	Serine protease (Fragment)	Echis coloratus	1	2	258	28.3	SVSPs	Snake venom serine proteinase
52	B5U6Y3	Serine protease sp-Eoc49	Echis ocellatus	1	5	258	28.2	SVSPs	Snake venom serine proteinase
53	E9JFZ9	Serine protease (Fragment)	Echis carinatus sochureki	1	2	233	25.5	SVSPs	Snake venom serine proteinase
54	Q71QH8	Serine protease CL4	Trimeresurus stejnegeri	1	1	257	28.9	SVSPs	Snake venom serine proteinase

## Sheet: S-3
Table S3. List of protein identified from Echis carinatus sockureki (IRAN) venom [South Khorasan population (SK)] using the RPLC-MS/MS bottom-up proteomics technique. Whole Ecs_SK venom were directly subjected to RPLC-MS/MS analyses after in-solution tryptic digestion. Protein identifications of bottom-up MS/MS data were accomplished by Proteome Discoverer software (version 2.2) against the Serpe…
South Khorasan_Crude_BU
	Accession	Description	Organism	# Peptides	# PSMs	# AAs	MW [kDa]	Protein classes
1	A0A0B8RXZ9	Snake venom 5'-nucleotidase	Boiga irregularis	2	3	588	64.7	5'NTD	5'-nucleotidase
2	Q7T3S7	Acidic phospholipase A2 EC-I	Echis carinatus	3	9	136	15.5	Acidic-PLA2	Phospholipase A2
3	P48650	Basic phospholipase A2 homolog ecarpholin S	Echis carinatus	12	77	122	13.8	Basic-PLA2	Phospholipase A2
4	A8CG84	Basic phospholipase A2 DsM-S1	Daboia siamensis	2	6	137	15.4	Basic-PLA2	Phospholipase A2
5	E9JG35	Metalloproteinase	Echis carinatus sochureki	4	12	615	69.1	P-III SVMP	Snake venom metallopeptidase
6	E9JG30	Metalloproteinase	Echis carinatus sochureki	7	12	612	68.7	P-III SVMP	Snake venom metallopeptidase
7	E9JGA4	Metalloproteinase	Echis coloratus	4	10	614	68.8	P-III SVMP	Snake venom metallopeptidase
8	E9JG32	Metalloproteinase	Echis carinatus sochureki	2	12	412	46.1	P-III SVMP	Snake venom metallopeptidase
9	P0DMT4	Cysteine-rich venom protein	Echis coloratus	3	8	220	24.7	CRiSP	Cysteine-rich secretory protein
10	P81017	Snaclec echicetin subunit alpha	Echis carinatus sochureki	3	12	133	15.8	CTL	Snake C-type lectin/lectin-like
11	A0A0A1WDW9	C-type lectin J	Echis coloratus	2	3	158	18.3	CTL	Snake C-type lectin/lectin-like
12	A0A0A1WD30	C-type lectin G (Fragment)	Echis coloratus	1	2	131	14.8	CTL	Snake C-type lectin/lectin-like
13	A0A1L8D645	BATXCTL19	Bothrops atrox	1	3	146	17	CTL	Snake C-type lectin/lectin-like
14	A0A1I9KNR4	Disintegrin Dis-1	Vipera ammodytes ammodytes	1	4	128	14	Dis	Disintegrin
15	U3TDL2	Glutaminyl_cyclase (Fragment)	Ovophis okinavensis	2	2	369	42.4	GpCT	Glutaminyl-peptide cyclotransferase
16	A0A0A1WCY6	Amine oxidase	Echis coloratus	6	18	504	56.7	LAOs	L-amino acid oxidase
17	R4FID0	Amine oxidase	Denisonia devisi	3	10	542	61.5	LAOs	L-amino acid oxidase
18	B5U6Y8	L-amino-acid oxidase	Echis ocellatus	5	13	504	56.5	LAOs	L-amino acid oxidase
19	A0A1L8D615	Amine oxidase	Bothrops atrox	4	10	502	56.6	LAOs	L-amino acid oxidase
20	P0C2D6	L-amino-acid oxidase (Fragment)	Protobothrops mucrosquamatus	2	8	24	2.9	LAOs	L-amino acid oxidase
21	W8E7D1	Phosphodiesterase	Macrovipera lebetina	2	3	851	96.1	PDE	Phosphodiesterase
22	E9JGH4	Metalloproteinase (Fragment)	Echis carinatus sochureki	5	8	248	27.7	P-II SVMP	Snake venom metallopeptidase
23	E9JGG7	Metalloproteinase (Fragment)	Echis carinatus sochureki	3	3	248	27.7	P-II SVMP	Snake venom metallopeptidase
24	E9KNB4	Group III snake venom metalloproteinase	Echis carinatus sochureki	3	7	612	68.6	P-III SVMP	Snake venom metallopeptidase
25	E9JG38	Metalloproteinase	Echis carinatus sochureki	11	53	607	68.4	P-III SVMP	Snake venom metallopeptidase
26	E9JG33	Metalloproteinase	Echis carinatus sochureki	8	25	618	69.3	P-III SVMP	Snake venom metallopeptidase
27	E9JG45	Metalloproteinase (Fragment)	Echis carinatus sochureki	7	17	276	30.8	P-III SVMP	Snake venom metallopeptidase
28	E9JG29	Metalloproteinase	Echis carinatus sochureki	10	41	607	68.2	P-III SVMP	Snake venom metallopeptidase
29	E9JG42	Metalloproteinase (Fragment)	Echis carinatus sochureki	7	15	255	28.3	P-III SVMP	Snake venom metallopeptidase
30	E9JGH1	Metalloproteinase	Echis carinatus sochureki	3	8	472	53.6	P-II SVMP	Snake venom metallopeptidase
31	E9JG26	Metalloproteinase	Echis carinatus sochureki	7	26	607	68.1	P-III SVMP	Snake venom metallopeptidase
32	E9JG37	Metalloproteinase (Fragment)	Echis carinatus sochureki	2	6	512	57.6	P-III SVMP	Snake venom metallopeptidase
33	E9JG92	Metalloproteinase	Echis coloratus	1	1	616	69.3	P-III SVMP	Snake venom metallopeptidase
34	E9JG39	Metalloproteinase	Echis carinatus sochureki	3	5	610	69.5	P-III SVMP	Snake venom metallopeptidase
35	E9KJY0	Group III snake venom metalloproteinase	Echis ocellatus	2	6	639	71.7	P-III SVMP	Snake venom metallopeptidase
36	E9JGA2	Metalloproteinase	Echis coloratus	1	2	621	69.2	P-III SVMP	Snake venom metallopeptidase
37	A0A194AS35	Metalloproteinase type III 7a	Sistrurus miliarius barbouri	1	1	609	68.4	P-III SVMP	Snake venom metallopeptidase
38	A0A081DUA8	Nerve growth factor a	Echis coloratus	3	7	244	27.2	NGF	Nerve growth factor
39	E9JG22	Serine protease (Fragment)	Echis carinatus sochureki	4	16	232	25.5	SVSPs	Snake venom serine proteinase
40	E9JG14	Serine protease (Fragment)	Echis carinatus sochureki	1	8	237	26.2	SVSPs	Snake venom serine proteinase
41	A0A0A1WDS7	Serine protease A (Fragment)	Echis coloratus	1	7	90	10.6	SVSPs	Snake venom serine proteinase
42	Q6IWF1	Snake venom serine protease BthaTL	Bothrops alternatus	1	6	233	25.6	SVSPs	Snake venom serine proteinase
43	P81038	Thrombin-like enzyme cerastotin (Fragments)	Cerastes cerastes	1	2	98	11.1	SVSPs	Snake venom serine proteinase
44	A0A194AM91	Serine proteinase 1	Agkistrodon piscivorus	1	4	257	28.1	SVSPs	Snake venom serine proteinase
45	Q91053	Thrombin-like enzyme calobin-1	Gloydius ussuriensis	1	4	262	28.9	SVSPs	Snake venom serine proteinase
46	E9JG06	Serine protease (Fragment)	Echis pyramidum leakeyi	1	3	258	28.3	SVSPs	Snake venom serine proteinase
47	E9JFZ9	Serine protease (Fragment)	Echis carinatus sochureki	1	2	233	25.5	SVSPs	Snake venom serine proteinase
48	E9JG23	Serine protease (Fragment)	Echis coloratus	1	3	260	28.4	SVSPs	Snake venom serine proteinase
49	A0A0A1WDM9	Serine protease D	Echis coloratus	1	1	260	28.8	SVSPs	Snake venom serine proteinase

## Sheet: S-4
Table S4. List of protein identified from Echis carinatus sockureki (IRAN) venom [Sistan&Baluchestan population (SB)] using the RPLC-MS/MS bottom-up proteomics technique. Whole Ecs_SB venom were directly subjected to RPLC-MS/MS analyses after in-solution tryptic digestion. Protein identifications of bottom-up MS/MS data were accomplished by Proteome Discoverer software (version 2.2) against the S…
Sistan and Bluchestan_crude_BU
	Accession	Description	Organism	# Peptides	# PSMs	# AAs	MW [kDa]	Protein classes
1	W8EFS0	5'-nucleotidase (Fragment)	Macrovipera lebetina	1	4	408	45	5'NTD	5'-nucleotidase
2	Q7T3S7	Acidic phospholipase A2 EC-I	Echis carinatus	2	7	136	15.5	Acidic PLA2	Phospholipase A2
3	A0A0F7ZB46	Aminopeptidase	Crotalus adamanteus	2	7	934	107.3	AP	Aminopeptidase
4	P48650	Basic phospholipase A2 homolog ecarpholin S	Echis carinatus	10	78	122	13.8	Basic PLA2	Phospholipase A2
5	A0A0D3N9S4	Basic phospholipase A2	Azemiops feae	1	6	138	15.7	Basic PLA2	Phospholipase A2
6	A0A1L8D602	BATXPLA5	Bothrops atrox	1	1	138	15.5	Basic PLA2	Phospholipase A2
7	P0DMT4	Cysteine-rich venom protein	Echis coloratus	5	22	220	24.7	CRiSP	Cysteine-rich secretory protein
8	P81017	Snaclec echicetin subunit alpha	Echis carinatus sochureki	2	9	133	15.8	CTL	Snake C-type lectin/lectin-like
9	A0A0A1WDW9	C-type lectin J	Echis coloratus	1	3	158	18.3	CTL	Snake C-type lectin/lectin-like
10	P81996	Snaclec echicetin subunit beta	Echis carinatus sochureki	1	2	123	14.9	CTL	Snake C-type lectin/lectin-like
11	P82465	Disintegrin EC6 subunit alpha	Echis carinatus sochureki	2	9	115	12.6	Dis	Disintegrin
12	M9NCG3	Glutaminyl-peptide cyclotransferases	Daboia russelii	2	4	368	42.1	GpCT	Glutaminyl-peptide cyclotransferase
13	B5U6Y8	L-amino-acid oxidase	Echis coloratus	4	13	504	56.5	LAOs	L-amino acid oxidase
14	A0A1L8D615	Amine oxidase	Bothrops atrox	3	6	502	56.6	LAOs	L-amino acid oxidase
15	P0C2D6	L-amino-acid oxidase (Fragment)	Protobothrops mucrosquamatus	2	8	24	2.9	LAOs	L-amino acid oxidase
16	R4FID0	Amine oxidase OS=Denisonia devisi	Denisonia devisi	2	4	542	61.5	LAOs	L-amino acid oxidase
17	A0A223PK33	Beta-nerve growth factor	Daboia russelii	1	6	247	27.7	NGF	Nerve growth factor
18	T2HPD6	Phosphodiesterase	Protobothrops flavoviridis	2	3	852	96.7	PDE	Phosphodiesterase
19	E9JGH4	Metalloproteinase (Fragment)	Echis carinatus sochureki	6	25	248	27.7	P-II SVMP	Snake venom metallopeptidase
20	E9JGH6	Metalloproteinase	Echis carinatus sochureki	2	6	128	14	P-II SVMP	Snake venom metallopeptidase
21	E9JGG7	Metalloproteinase (Fragment)	Echis carinatus sochureki	2	6	248	27.7	P-II SVMP	Snake venom metallopeptidase
22	E9JG38	Metalloproteinase	Echis carinatus sochureki	13	71	607	68.4	P-III SVMP	Snake venom metallopeptidase
23	E9JG29	Metalloproteinase	Echis carinatus sochureki	12	56	607	68.2	P-III SVMP	Snake venom metallopeptidase
24	E9JG45	Metalloproteinase (Fragment)	Echis carinatus sochureki	8	34	276	30.8	P-III SVMP	Snake venom metallopeptidase
25	E9JG33	Metalloproteinase	Echis carinatus sochureki	10	39	618	69.3	P-III SVMP	Snake venom metallopeptidase
26	E9JG35	Metalloproteinase	Echis carinatus sochureki	7	23	615	69.1	P-III SVMP	Snake venom metallopeptidase
27	E9JG26	Metalloproteinase	Echis carinatus sochureki	8	26	607	68.1	P-III SVMP	Snake venom metallopeptidase
28	E9JG30	Metalloproteinase	Echis carinatus sochureki	5	20	612	68.7	P-III SVMP	Snake venom metallopeptidase
29	E9KNB4	Group III snake venom metalloproteinase	Echis carinatus sochureki	3	15	612	68.6	P-III SVMP	Snake venom metallopeptidase
30	E9JG39	Metalloproteinase	Echis carinatus sochureki	8	22	610	69.5	P-III SVMP	Snake venom metallopeptidase
31	E9JGH1	Metalloproteinase	Echis carinatus sochureki	3	15	472	53.6	P-III SVMP	Snake venom metallopeptidase
32	E9JG42	Metalloproteinase (Fragment)	Echis carinatus sochureki	5	19	255	28.3	P-III SVMP	Snake venom metallopeptidase
33	E9JG32	Metalloproteinase	Echis carinatus sochureki	4	14	412	46.1	P-III SVMP	Snake venom metallopeptidase
34	E9JG37	Metalloproteinase (Fragment)	Echis carinatus sochureki	4	10	512	57.6	P-III SVMP	Snake venom metallopeptidase
35	E9JG84	Metalloproteinase	Echis coloratus	4	12	629	70.3	P-III SVMP	Snake venom metallopeptidase
36	E9KJY0	Group III snake venom metalloproteinase	Echis ocellatus	3	5	639	71.7	P-III SVMP	Snake venom metallopeptidase
37	E9JGA4	Metalloproteinase	Echis coloratus	2	8	614	68.8	P-III SVMP	Snake venom metallopeptidase
38	E9JG34	Metalloproteinase	Echis carinatus sochureki	3	6	610	69.2	P-III SVMP	Snake venom metallopeptidase
39	E9JG58	Metalloproteinase (Fragment)	Echis coloratus	2	5	505	56.4	P-III SVMP	Snake venom metallopeptidase
40	A0A194AS35	Metalloproteinase type III 7a	Sistrurus miliarius barbouri	1	2	609	68.4	P-III SVMP	Snake venom metallopeptidase
41	A0A0A1WDU0	Phospholipase B-like	Echis coloratus	1	2	553	64.5	PLB	Phospholipase B
42	E9JG22	Serine protease (Fragment)	Echis carinatus sochureki	3	14	232	25.5	SVSPs	Snake venom serine proteinase
43	E9JG14	Serine protease (Fragment)	Echis carinatus sochureki	3	16	237	26.2	SVSPs	Snake venom serine proteinase
44	P81038	Thrombin-like enzyme cerastotin (Fragments)	Cerastes cerastes	1	8	98	11.1	SVSPs	Snake venom serine proteinase
45	E9JG06	Serine protease (Fragment)	Echis pyramidum leakeyi	2	6	258	28.3	SVSPs	Snake venom serine proteinase
46	E5L0E3	Alpha-fibrinogenase-like	Daboia siamensis	2	6	258	28.5	SVSPs	Snake venom serine proteinase
47	A1E237	Venom thrombin-like enzyme (Fragment)	Deinagkistrodon acutus	2	4	235	25.5	SVSPs	Snake venom serine proteinase
48	A0A194APA8	Serine proteinase 3	Agkistrodon piscivorus	2	6	258	28.2	SVSPs	Snake venom serine proteinase
49	E9JG01	Serine protease (Fragment)	Echis coloratus	2	8	258	28.3	SVSPs	Snake venom serine proteinase
50	A0A194AM91	Serine proteinase 1	Agkistrodon piscivorus	1	2	257	28.1	SVSPs	Snake venom serine proteinase
51	B5U6Y3	Serine protease sp-Eoc49	Echis ocellatus	1	2	258	28.2	SVSPs	Snake venom serine proteinase
52	T1DEE8	Kallikrein-CohPH-2	Crotalus oreganus helleri	1	1	266	29.9	SVSPs	Snake venom serine proteinase
53	A0A194ARJ3	Serine proteinase 13c	Agkistrodon piscivorus	1	1	258	28	SVSPs	Snake venom serine proteinase

## Sheet: S-5
Table S5. List of protein identified from Echis carinatus sockureki (IRAN) venom [Hormozgan population (HO)] using the SEC-RPLC-MS/MS bottom-up proteomics technique. The six isolated fractions of Ecs_HO venom were subjected to RPLC-MS/MS analyses after in-solution tryptic digestion. Protein identifications of bottom-up MS/MS data were accomplished by Proteome Discoverer software (version 2.2) aga…
Hormozgan_Fractions_BU
	Accession	Description	Organism	# Peptides	# PSMs	# AAs	MW [kDa]	Protein classes
1	Q6T5K9	Acidic phospholipase A2 (Fragment)	Gloydius shedaoensis	3	21	122	13.6	Acidic PLA2	Phospholipase A2
2	Q7T3S7	Acidic phospholipase A2 EC-I	Echis carinatus	3	100	136	15.5	Acidic PLA2	Phospholipase A2
3	Q18DC8	Renin-like aspartic protease	Echis ocellatus	3	29	395	43.8	RLAP	Renin-like aspartic protease
4	A0A0A1WDP8	Renin (Fragment)	Echis coloratus	1	6	113	12.1	RLAP	Renin-like aspartic protease
5	P48650	Basic phospholipase A2 homolog ecarpholin S	Echis carinatus	12	816	122	13.8	Basic PLA2	Phospholipase A2
6	P0DMT4	Cysteine-rich venom protein	Echis coloratus	7	221	220	24.7	CRiSP	Cysteine-rich secretory protein
7	P79845	Cysteine-rich venom protein	Protobothrops mucrosquamatus	3	145	240	26.7	CRiSP	Cysteine-rich secretory protein
8	Q7T2Q1	Snaclec EMS16 subunit alpha	Echis multisquamatus	5	26	157	18.2	CTL	Snake C-type lectin/lectin-like
9	P81798	Snaclec multactivase regulatory subunit (Fragment)	Echis multisquamatus	1	27	29	3.5	CTL	Snake C-type lectin/lectin-like
10	P81017	Snaclec echicetin subunit alpha	Echis carinatus sochureki	3	59	133	15.8	CTL	Snake C-type lectin/lectin-like
11	A0A0A1WDW9	C-type lectin J	Echis coloratus	3	44	158	18.3	CTL	Snake C-type lectin/lectin-like
12	Q7T2Q0	Snaclec EMS16 subunit beta	Echis multisquamatus	2	3	154	17.7	CTL	Snake C-type lectin/lectin-like
13	B4XSZ9	Snaclec A9	Macrovipera lebetina	1	4	133	15.6	CTL	Snake C-type lectin/lectin-like
14	P81996	Snaclec echicetin subunit beta	Echis carinatus sochureki	1	21	123	14.9	CTL	Snake C-type lectin/lectin-like
15	Q8AYA5	Snaclec agglucetin subunit alpha-2	Deinagkistrodon acutus	1	1	158	18	CTL	Snake C-type lectin/lectin-like
16	B5U6Y6	Snaclec CTL-Eoc124	Echis ocellatus	1	2	146	16.9	CTL	Snake C-type lectin/lectin-like
17	B4XT00	Snaclec B1	Macrovipera lebetina	1	4	148	16.6	CTL	Snake C-type lectin/lectin-like
18	Q6X5S1	Snaclec 5	Echis pyramidum leakeyi	2	4	146	16.7	CTL	Snake C-type lectin/lectin-like
19	A0A0A1WD34	C-type lectin B (Fragment)	Echis coloratus	1	6	113	13.6	CTL	Snake C-type lectin/lectin-like
20	P82465	Disintegrin EC6 subunit alpha	Echis carinatus sochureki	3	49	115	12.6	Dis	Disintegrin
21	M9NCG3	Glutaminyl-peptide cyclotransferases	Daboia russelii	9	102	368	42.1	GpCT	Glutaminyl-peptide cyclotransferase
22	A3QVN2	Hyaluronidase	Echis ocellatus	1	2	449	52.5	HYAL	Hyaluronidase
23	P0C2D6	L-amino-acid oxidase (Fragment)	Protobothrops mucrosquamatus	2	64	24	2.9	LAOs	L-amino acid oxidase
24	G8XQX1	L-amino-acid oxidase	Daboia russelii	8	99	504	56.9	LAOs	L-amino acid oxidase
25	A0A0A1WCY6	Amine oxidase	Echis coloratus	7	112	504	56.7	LAOs	L-amino acid oxidase
26	A0A1L8D615	Amine oxidase	Bothrops atrox	5	58	502	56.6	LAOs	L-amino acid oxidase
27	R4FID0	Amine oxidase	Denisonia devisi	3	68	542	61.5	LAOs	L-amino acid oxidase
28	A0A081DUA8	Nerve growth factor a	Echis coloratus	3	47	244	27.2	NGF	Nerve growth factor
29	W8EFS0	5'-nucleotidase (Fragment)	Macrovipera lebetina	8	78	408	45	5'NTD	5'-nucleotidase
30	A0A2I4HXH5	Venom 5'-nucleotidase	Naja atra	8	71	529	58.2	5'NTD	5'-nucleotidase
31	W8E7D1	Phosphodiesterase	Macrovipera lebetina	8	42	851	96.1	PDE	Phosphodiesterase
32	A0A0F7Z2Q3	Phosphodiesterase	Crotalus adamanteus	4	29	851	96.3	PDE	Phosphodiesterase
33	T1E6L9	Aminopeptidase	Crotalus horridus	11	62	934	107.3	AP	Aminopeptidase
34	E9JGH4	Metalloproteinase (Fragment)	Echis carinatus sochureki	11	265	248	27.7	P-II SVMP	Snake venom metallopeptidase
35	E9JGH6	Metalloproteinase	Echis carinatus sochureki	3	21	128	14	P-II SVMP	Snake venom metallopeptidase
36	E9JGC9	Metalloproteinase (Fragment)	Echis pyramidum leakeyi	6	99	345	38.4	P-III SVMP	Snake venom metallopeptidase
37	E9JGG8	Metalloproteinase (Fragment)	Echis carinatus sochureki	5	77	327	36.6	P-II SVMP	Snake venom metallopeptidase
38	E9JGH1	Metalloproteinase	Echis carinatus sochureki	6	94	472	53.6	P-II SVMP	Snake venom metallopeptidase
39	T2HRS1	p-II metalloprotease (Fragment)	Protobothrops flavoviridis	1	20	233	26.6	SVMP	Snake venom metallopeptidase
40	A0A0K8RYV2	Metalloproteinase (Type II) 4c	Crotalus horridus	1	3	478	53.7	P-II SVMP	Snake venom metallopeptidase
41	C0L2T8	Metalloprotease PII	Crotalus durissus collilineatus	1	4	478	53.6	P-II SVMP	Snake venom metallopeptidase
42	E9JG42	Metalloproteinase (Fragment)	Echis carinatus sochureki	12	181	255	28.3	P-III SVMP	Snake venom metallopeptidase
43	E9JG45	Metalloproteinase (Fragment)	Echis carinatus sochureki	11	222	276	30.8	P-III SVMP	Snake venom metallopeptidase
44	E9JG52	Metalloproteinase	Echis carinatus sochureki	22	463	618	69.3	P-III SVMP	Snake venom metallopeptidase
45	E9JG53	Metalloproteinase (Fragment)	Echis carinatus sochureki	9	103	247	27.8	P-III SVMP	Snake venom metallopeptidase
46	E9JG35	Metalloproteinase	Echis carinatus sochureki	16	231	615	69.1	P-III SVMP	Snake venom metallopeptidase
47	E9JG44	Metalloproteinase (Fragment)	Echis carinatus sochureki	7	73	270	29.9	P-III SVMP	Snake venom metallopeptidase
48	E9JG29	Metalloproteinase	Echis carinatus sochureki	16	309	607	68.2	P-III SVMP	Snake venom metallopeptidase
49	E9JG41	Metalloproteinase	Echis carinatus sochureki	16	403	607	68.4	P-III SVMP	Snake venom metallopeptidase
50	E9JG26	Metalloproteinase	Echis carinatus sochureki	12	182	607	68.1	P-III SVMP	Snake venom metallopeptidase
51	E9KNB4	Group III snake venom metalloproteinase	Echis carinatus sochureki	11	81	612	68.6	P-III SVMP	Snake venom metallopeptidase
52	E9JG50	Metalloproteinase (Fragment)	Echis carinatus sochureki	9	112	369	41.1	P-III SVMP	Snake venom metallopeptidase
53	E9JG34	Metalloproteinase	Echis carinatus sochureki	11	125	610	69.2	P-III SVMP	Snake venom metallopeptidase
54	E9JG32	Metalloproteinase	Echis carinatus sochureki	8	129	412	46.1	P-III SVMP	Snake venom metallopeptidase
55	E9JG39	Metalloproteinase	Echis carinatus sochureki	10	187	610	69.5	P-III SVMP	Snake venom metallopeptidase
56	E9JG92	Metalloproteinase	Echis coloratus	7	81	616	69.3	P-III SVMP	Snake venom metallopeptidase
57	E9JG30	Metalloproteinase	Echis carinatus sochureki	11	205	612	68.7	P-III SVMP	Snake venom metallopeptidase
58	E9KJZ6	Group III snake venom metalloproteinase (Fragment)	Echis ocellatus	6	96	553	62.6	P-III SVMP	Snake venom metallopeptidase
59	E9JG58	Metalloproteinase (Fragment)	Echis coloratus	5	61	505	56.4	P-III SVMP	Snake venom metallopeptidase
60	Q2UXQ6	Group III snake venom metalloproteinase	Echis ocellatus	5	37	610	69.6	P-III SVMP	Snake venom metallopeptidase
61	E9JGA2	Metalloproteinase	Echis coloratus	5	49	621	69.2	P-III SVMP	Snake venom metallopeptidase
62	A0A2H4Z2X4	DSAIP (Fragment)	Daboia siamensis	4	67	619	69.1	P-III SVMP	Snake venom metallopeptidase
63	E9JGA4	Metalloproteinase	Echis coloratus	3	67	614	68.8	P-III SVMP	Snake venom metallopeptidase
64	A0A2H4Z2W1	RVV-X heavy chain	Daboia siamensis	3	54	619	69.3	P-III SVMP	Snake venom metallopeptidase
65	A0A1L8D641	BATXSVMPIII9	Bothrops atrox	1	1	604	67.7	P-III SVMP	Snake venom metallopeptidase
66	A0A194AQ28	Metalloproteinase type III 11	Sistrurus miliarius barbouri	1	6	606	67.7	P-III SVMP	Snake venom metallopeptidase
67	A0A194AS35	Metalloproteinase type III 7a	Sistrurus miliarius barbouri	1	4	609	68.4	P-III SVMP	Snake venom metallopeptidase
68	R4G2W9	SVMP-Hem-2 (Fragment)	Hemiaspis signata	1	2	554	61.9	P-III SVMP	Snake venom metallopeptidase
69	A0A194APS0	Phospholipase A2 3c	Agkistrodon piscivorus	1	31	138	15.6	PLA2	Phospholipase A2
70	Q4QT05	PLA2-19 (Fragment)	Bitis arietans	1	5	138	15.7	PLA2	Phospholipase A2
71	O93233	Phospholipase A2 inhibitor	Gloydius brevicaudus siniticus	1	2	331	37.1	PLA2	Phospholipase A2
72	A0A0A1WDU0	Phospholipase B-like	Echis coloratus	9	43	553	64.5	PLB	Phospholipase B
73	A0A182C6E9	Phospholipase B-like	Phalotris mertensi	3	24	553	64.4	PLB	Phospholipase B
74	Q9PS28	Thrombin-like enzyme RP34 (Fragment)	Cerastes cerastes	2	22	33	3.8	SVSPs	Snake venom serine proteinase
75	E9JG14	Serine protease (Fragment)	Echis carinatus sochureki	7	105	237	26.2	SVSPs	Snake venom serine proteinase
76	E9JFZ9	Serine protease (Fragment)	Echis carinatus sochureki	5	41	233	25.5	SVSPs	Snake venom serine proteinase
77	E9JG22	Serine protease (Fragment)	Echis carinatus sochureki	4	80	232	25.5	SVSPs	Snake venom serine proteinase
78	E9JG24	Serine protease (Fragment)	Echis carinatus sochureki	3	12	235	25.7	SVSPs	Snake venom serine proteinase
79	A0A194APA8	Serine proteinase 3	Agkistrodon piscivorus	2	21	258	28.2	SVSPs	Snake venom serine proteinase
80	E9JG17	Serine protease (Fragment)	Echis coloratus	4	33	235	25.4	SVSPs	Snake venom serine proteinase
81	P81038	Thrombin-like enzyme cerastotin (Fragments)	Cerastes cerastes	1	53	98	11.1	SVSPs	Snake venom serine proteinase
82	A0A0A1WDS7	Serine protease A (Fragment)	Echis coloratus	1	40	90	10.6	SVSPs	Snake venom serine proteinase
83	T1E6T7	Kallikrein-CohID-1	Crotalus oreganus helleri	2	17	259	28.2	SVSPs	Snake venom serine proteinase
84	A0A1W7RB99	Cadam10_SVSP-1	Crotalus adamanteus	2	8	260	28.9	SVSPs	Snake venom serine proteinase
85	A0A286S0E1	Venom plasminogen activator 4	Gloydius intermedius	1	4	258	28.1	SVSPs	Snake venom serine proteinase
86	A0A194APJ3	Serine proteinase 6	Agkistrodon piscivorus	1	3	258	28.1	SVSPs	Snake venom serine proteinase
87	E9JG06	Serine protease (Fragment)	Echis pyramidum leakeyi	2	29	258	28.3	SVSPs	Snake venom serine proteinase
88	Q98TT5	Thrombin-like enzyme	Deinagkistrodon acutus	2	7	258	27.7	SVSPs	Snake venom serine proteinase
89	E9JG20	Serine protease (Fragment)	Echis pyramidum leakeyi	2	10	236	26.3	SVSPs	Snake venom serine proteinase
90	A0A1Y0DIB5	Serine protease	Azemiops feae	1	12	258	28.3	SVSPs	Snake venom serine proteinase
91	E5L0E3	Alpha-fibrinogenase-like	Daboia siamensis	2	19	258	28.5	SVSPs	Snake venom serine proteinase
92	Q91053	Thrombin-like enzyme calobin-1	Gloydius ussuriensis	2	14	262	28.9	SVSPs	Snake venom serine proteinase
93	A0A194AM91	Serine proteinase 1	Agkistrodon piscivorus	1	3	257	28.1	SVSPs	Snake venom serine proteinase
94	E9JG01	Serine protease (Fragment)	Echis coloratus	2	21	258	28.3	SVSPs	Snake venom serine proteinase
95	A8HR02	Thrombin-like protein (Fragment)	Deinagkistrodon acutus	1	4	236	26	SVSPs	Snake venom serine proteinase
96	A0A0A1WDM9	Serine protease D	Echis coloratus	1	10	260	28.8	SVSPs	Snake venom serine proteinase
97	T1DEE8	Kallikrein-CohPH-2	Crotalus oreganus helleri	1	19	266	29.9	SVSPs	Snake venom serine proteinase
98	Q71QI2	Snake venom serine protease CL2	Trimeresurus stejnegeri	1	8	258	27.8	SVSPs	Snake venom serine proteinase
99	B5U6Y3	Serine protease sp-Eoc49	Echis ocellatus	1	8	258	28.2	SVSPs	Snake venom serine proteinase
100	Q71QH8	Serine protease CL4	Trimeresurus stejnegeri	1	15	257	28.9	SVSPs	Snake venom serine proteinase
101	A0A1J0CZM5	Vammin-1	Vipera ammodytes ammodytes	1	6	145	16.3	VEGF	Vascular endothelial growth factor

## Sheet: S-6
Table S6. List of protein identified from Echis carinatus sockureki (IRAN) venom [South Khorasan population (SK)] using the SEC-RPLC-MS/MS bottom-up proteomics technique. The six isolated fractions of Ecs_SK venom were subjected to RPLC-MS/MS analyses after in-solution tryptic digestion. Protein identifications of bottom-up MS/MS data were accomplished by Proteome Discoverer software (version 2.2…
South Khorasan_Fractions_BU
	Accession	Description	Organism	# PSMs	# AAs	MW [kDa]	Protein families
1	A0A223PK10	Carboxylic ester hydrolase (Fragment)	Daboia russelii	1	555	62.4	AChE	Acetylcholinesterase
2	Q6T5K9	Acidic phospholipase A2 (Fragment)	Gloydius shedaoensis	25	122	13.6	Acidic PLA2	Phospholipase A2
3	Q7T3S7	Acidic phospholipase A2 EC-I	Echis carinatus	132	136	15.5	Acidic PLA2	Phospholipase A2
4	P48650	Basic phospholipase A2 homolog ecarpholin S	Echis carinatus	953	122	13.8	Basic PLA2	Phospholipase A2
5	A0A0D3N9S4	Basic phospholipase A2	Azemiops feae	5	138	15.7	Basic PLA2	Phospholipase A2
6	P85099	Cysteine-rich venom protein (Fragment)	Philodryas patagoniensis	3	14	1.7	CRiSP	Cysteine-rich secretory protein
7	P0DMT4	Cysteine-rich venom protein	Echis coloratus	324	220	24.7	CRiSP	Cysteine-rich secretory protein
8	Q7T2Q1	Snaclec EMS16 subunit alpha	Echis multisquamatus	20	157	18.2	CTL	Snake C-type lectin/lectin-like
9	P81798	Snaclec multactivase regulatory subunit (Fragment)	Echis multisquamatus	32	29	3.5	CTL	Snake C-type lectin/lectin-like
10	P81017	Snaclec echicetin subunit alpha	Echis carinatus sochureki	83	133	15.8	CTL	Snake C-type lectin/lectin-like
11	Q7T2Q0	Snaclec EMS16 subunit beta	Echis multisquamatus	11	154	17.7	CTL	Snake C-type lectin/lectin-like
12	A0A0A1WDW9	C-type lectin J	Echis coloratus	27	158	18.3	CTL	Snake C-type lectin/lectin-like
13	A0A1B3AXS3	C-type lectin-like protein	Bitis arietans	27	154	17.9	CTL	Snake C-type lectin/lectin-like
14	B4XSZ9	Snaclec A9	Macrovipera lebetina	4	133	15.6	CTL	Snake C-type lectin/lectin-like
15	P81996	Snaclec echicetin subunit beta	Echis carinatus sochureki	18	123	14.9	CTL	Snake C-type lectin/lectin-like
16	B4XT00	Snaclec B1	Macrovipera lebetina	8	148	16.6	CTL	Snake C-type lectin/lectin-like
17	A0A0C5E3E9	C-type lectin-like protein 4A	Macrovipera lebetina	8	158	18	CTL	Snake C-type lectin/lectin-like
18	A0A0A1WD34	C-type lectin B (Fragment)	Echis coloratus	2	113	13.6	CTL	Snake C-type lectin/lectin-like
19	P82465	Disintegrin EC6 subunit alpha	Echis carinatus sochureki	51	115	12.6	DIS	Disintegrin
20	M9NCG3	Glutaminyl-peptide cyclotransferases	Daboia russelii	51	368	42.1	GpCT	Glutaminyl-peptide cyclotransferase
21	A3QVN3	Hyaluronidase-1	Cerastes cerastes	4	449	52.6	HYAL	Hyaluronidase
22	A0A0A1WCY6	Amine oxidase	Echis coloratus	111	504	56.7	LAOs	L-amino acid oxidase
23	B5U6Y8	L-amino-acid oxidase	Echis ocellatus	85	504	56.5	LAOs	L-amino acid oxidase
24	E9JGA4	Metalloproteinase	Echis coloratus	64	614	68.8	LAOs	L-amino acid oxidase
25	R4FID0	Amine oxidase	Denisonia devisi	53	542	61.5	LAOs	L-amino acid oxidase
26	P0C2D6	L-amino-acid oxidase (Fragment)	Protobothrops mucrosquamatus	46	24	2.9	LAOs	L-amino acid oxidase
27	A0A081DUA8	Nerve growth factor a	Echis coloratus	64	244	27.2	NGF	Nerve growth factor
28	W8EFS0	5'-nucleotidase (Fragment)	Macrovipera lebetina	46	408	45	5'NTD	5'-nucleotidase
29	A0A2I4HXH5	Venom 5'-nucleotidase	Naja atra	39	529	58.2	5'NTD	5'-nucleotidase
30	W8E7D1	Phosphodiesterase	Macrovipera lebetina	33	851	96.1	PDE	Phosphodiesterase
31	A0A0F7Z2Q3	Phosphodiesterase	Crotalus adamanteus	32	851	96.3	PDE	Phosphodiesterase
32	T1E6L9	Aminopeptidase	Crotalus horridus	46	934	107.3	AP	Aminopeptidase
33	A0A0B8RR20	Dipeptidase	Boiga irregularis	1	411	45.8	DPEP	Dipeptidyl peptidase
34	E9JGH4	Metalloproteinase (Fragment)	Echis carinatus sochureki	328	248	27.7	P-II SVMP	Snake venom metallopeptidase
35	E9JGH6	Metalloproteinase	Echis carinatus sochureki	20	128	14	P-II SVMP	Snake venom metallopeptidase
36	E9JGH1	Metalloproteinase	Echis carinatus sochureki	134	472	53.6	P-II SVMP	Snake venom metallopeptidase
37	E9JGG8	Metalloproteinase (Fragment)	Echis carinatus sochureki	57	327	36.6	P-II SVMP	Snake venom metallopeptidase
38	T2HRS1	p-II metalloprotease (Fragment)	Protobothrops flavoviridis	18	233	26.6	SVMP	Snake venom metallopeptidase
39	A0A0K8RYV2	Metalloproteinase (Type II) 4c	Crotalus horridus	1	478	53.7	P-II SVMP	Snake venom metallopeptidase
40	E9JG42	Metalloproteinase (Fragment)	Echis carinatus sochureki	199	255	28.3	P-III SVMP	Snake venom metallopeptidase
41	E9JG44	Metalloproteinase (Fragment)	Echis carinatus sochureki	67	270	29.9	P-III SVMP	Snake venom metallopeptidase
42	E9JG45	Metalloproteinase (Fragment)	Echis carinatus sochureki	236	276	30.8	P-III SVMP	Snake venom metallopeptidase
43	E9JG52	Metalloproteinase	Echis carinatus sochureki	480	618	69.3	P-III SVMP	Snake venom metallopeptidase
44	E9JG53	Metalloproteinase (Fragment)	Echis carinatus sochureki	90	247	27.8	P-III SVMP	Snake venom metallopeptidase
45	E9JG29	Metalloproteinase	Echis carinatus sochureki	287	607	68.2	P-III SVMP	Snake venom metallopeptidase
46	E9JG35	Metalloproteinase	Echis carinatus sochureki	168	615	69.1	P-III SVMP	Snake venom metallopeptidase
47	E9JG26	Metalloproteinase	Echis carinatus sochureki	182	607	68.1	P-III SVMP	Snake venom metallopeptidase
48	E9JG41	Metalloproteinase	Echis carinatus sochureki	386	607	68.4	P-III SVMP	Snake venom metallopeptidase
49	E9JG32	Metalloproteinase	Echis carinatus sochureki	155	412	46.1	P-III SVMP	Snake venom metallopeptidase
50	E9KNB4	Group III snake venom metalloproteinase	Echis carinatus sochureki	76	612	68.6	P-III SVMP	Snake venom metallopeptidase
51	E9JG50	Metalloproteinase (Fragment)	Echis carinatus sochureki	114	369	41.1	P-III SVMP	Snake venom metallopeptidase
52	E9JG34	Metalloproteinase	Echis carinatus sochureki	112	610	69.2	P-III SVMP	Snake venom metallopeptidase
53	E9JG30	Metalloproteinase	Echis carinatus sochureki	143	612	68.7	P-III SVMP	Snake venom metallopeptidase
54	E9JG39	Metalloproteinase	Echis carinatus sochureki	179	610	69.5	P-III SVMP	Snake venom metallopeptidase
55	E9JG92	Metalloproteinase	Echis coloratus	57	616	69.3	P-III SVMP	Snake venom metallopeptidase
56	E9KJZ6	Group III snake venom metalloproteinase (Fragment)	Echis ocellatus	96	553	62.6	P-III SVMP	Snake venom metallopeptidase
57	Q2UXQ6	Group III snake venom metalloproteinase	Echis ocellatus	31	610	69.6	P-III SVMP	Snake venom metallopeptidase
58	Q2UXQ0	Group III snake venom metalloproteinase	Echis ocellatus	58	622	69.8	P-III SVMP	Snake venom metallopeptidase
59	E9JGA2	Metalloproteinase	Echis coloratus	17	621	69.2	P-III SVMP	Snake venom metallopeptidase
60	A0A2H4Z2X4	DSAIP (Fragment)	Daboia siamensis	41	619	69.1	P-III SVMP	Snake venom metallopeptidase
61	A0A2H4Z2W1	RVV-X heavy chain	Daboia siamensis	36	619	69.3	P-III SVMP	Snake venom metallopeptidase
62	A0A194AQ28	Metalloproteinase type III 11	Sistrurus miliarius barbouri	9	606	67.7	P-III SVMP	Snake venom metallopeptidase
63	A0A194APS0	Phospholipase A2 3c	Agkistrodon piscivorus	23	138	15.6	PLA2	Phospholipase A2
64	Q4QT05	PLA2-19 (Fragment)	Bitis arietans	6	138	15.7	PLA2	Phospholipase A2
65	A0A0A1WDU0	Phospholipase B-like	Echis coloratus	20	553	64.5	PLB	Phospholipase B
66	A0A182C6E9	Phospholipase B-like	Phalotris mertensi	14	553	64.4	PLB	Phospholipase B
67	Q18DC8	Renin-like aspartic protease	Echis ocellatus	13	395	43.8	RLAP	Renin-like aspartic protease
68	A0A0A1WDP8	Renin (Fragment)	Echis coloratus	6	113	12.1	RLAP	Renin-like aspartic protease
69	V8PJ14	Renin (Fragment)	Ophiophagus hannah	4	363	40.2	RLAP	Renin-like aspartic protease
70	E9JG22	Serine protease (Fragment)	Echis carinatus sochureki	107	232	25.5	SVSPs	Snake venom serine proteinase
71	E9JG14	Serine protease (Fragment)	Echis carinatus sochureki	124	237	26.2	SVSPs	Snake venom serine proteinase
72	E9JFZ9	Serine protease (Fragment)	Echis carinatus sochureki	57	233	25.5	SVSPs	Snake venom serine proteinase
73	E9JFZ5	Serine protease (Fragment)	Echis pyramidum leakeyi	9	208	22.9	SVSPs	Snake venom serine proteinase
74	A0A194APA8	Serine proteinase 3	Agkistrodon piscivorus	36	258	28.2	SVSPs	Snake venom serine proteinase
75	E9JG17	Serine protease (Fragment)	Echis coloratus	13	235	25.4	SVSPs	Snake venom serine proteinase
76	P81038	Thrombin-like enzyme cerastotin (Fragments)	Cerastes cerastes	41	98	11.1	SVSPs	Snake venom serine proteinase
77	A0A0A1WDS7	Serine protease A (Fragment)	Echis coloratus	32	90	10.6	SVSPs	Snake venom serine proteinase
78	T1E6T7	Kallikrein-CohID-1	Crotalus oreganus helleri	13	259	28.2	SVSPs	Snake venom serine proteinase
79	E9JG20	Serine protease (Fragment)	Echis pyramidum leakeyi	24	236	26.3	SVSPs	Snake venom serine proteinase
80	A0A1W7RB99	Cadam10_SVSP-1	Crotalus adamanteus	6	260	28.9	SVSPs	Snake venom serine proteinase
81	A0A286S0E1	Venom plasminogen activator 4	Gloydius intermedius	2	258	28.1	SVSPs	Snake venom serine proteinase
82	A0A194APJ3	Serine proteinase 6	Agkistrodon piscivorus	4	258	28.1	SVSPs	Snake venom serine proteinase
83	A1E236	Venom thrombin-like enzyme (Fragment)	Deinagkistrodon acutus	16	235	25.2	SVSPs	Snake venom serine proteinase
84	Q98TT5	Thrombin-like enzyme	Deinagkistrodon acutus	9	258	27.7	SVSPs	Snake venom serine proteinase
85	E9JG06	Serine protease (Fragment)	Echis pyramidum leakeyi	18	258	28.3	SVSPs	Snake venom serine proteinase
86	A0A194ASU5	Serine proteinase 12a	Sistrurus miliarius barbouri	2	257	28.1	SVSPs	Snake venom serine proteinase
87	A0A1Y0DIB5	Serine protease	Azemiops feae	16	258	28.3	SVSPs	Snake venom serine proteinase
88	E5L0E3	Alpha-fibrinogenase-like	Daboia siamensis	23	258	28.5	SVSPs	Snake venom serine proteinase
89	Q91053	Thrombin-like enzyme calobin-1	Gloydius ussuriensis	11	262	28.9	SVSPs	Snake venom serine proteinase
90	A0A194AM91	Serine proteinase 1	Agkistrodon piscivorus	7	257	28.1	SVSPs	Snake venom serine proteinase
91	E9JG01	Serine protease (Fragment)	Echis coloratus	28	258	28.3	SVSPs	Snake venom serine proteinase
92	A0A1L8D615	Amine oxidase	Bothrops atrox	57	502	56.6	SVSPs	Snake venom serine proteinase
93	D5KRY0	Serine protease (Fragment)	Echis ocellatus	20	258	28.2	SVSPs	Snake venom serine proteinase
94	A0A0A1WDM9	Serine protease D	Echis coloratus	19	260	28.8	SVSPs	Snake venom serine proteinase
95	T1DEE8	Kallikrein-CohPH-2	Crotalus oreganus helleri	22	266	29.9	SVSPs	Snake venom serine proteinase
96	Q71QI2	Snake venom serine protease CL2	Trimeresurus stejnegeri	16	258	27.8	SVSPs	Snake venom serine proteinase
97	A0A194APK4	Serine proteinase 6b	Sistrurus tergeminus	3	262	28.9	SVSPs	Snake venom serine proteinase
98	Q71QH8	Serine protease CL4	Trimeresurus stejnegeri	7	257	28.9	SVSPs	Snake venom serine proteinase
99	A0A1J0CZM5	Vammin-1	Vipera ammodytes ammodytes	2	145	16.3	VEGF	Vascular endothelial growth factor

## Sheet: S-7
Table S7. List of protein identified from Echis carinatus sockureki (IRAN) venom [Sistan&Baluchestan population (SB)] using the SEC-RPLC-MS/MS bottom-up proteomics technique. The six isolated fractions of Ecs_SB venom were subjected to RPLC-MS/MS analyses after in-solution tryptic digestion. Protein identifications of bottom-up MS/MS data were accomplished by Proteome Discoverer software (version…
Sistan and Bluchestan_Fractions_BU
	Accession	Description	organism	# PSMs	# AAs	MW [kDa]	Protein class
1	Q7T3S7	Acidic phospholipase A2 EC-I	Echis carinatus	109	136	15.5	Acidic PLA2	Phospholipase A2
2	P48650	Basic phospholipase A2 homolog ecarpholin S	Echis carinatus	568	122	13.8	Basic PLA2	Phospholipase A2
3	P0CAS4	Basic phospholipase A2 Cdr-13	Crotalus durissus ruruima	6	122	14.3	Basic PLA2	Phospholipase A2
4	P0DMT4	Cysteine-rich venom protein	Echis coloratus	172	220	24.7	CRiSP	Cysteine-rich secretory protein
5	P81798	Snaclec multactivase regulatory subunit (Fragment)	Echis multisquamatus	29	29	3.5	CTL	Snake C-type lectin/lectin-like
6	Q7T2Q1	Snaclec EMS16 subunit alpha	Echis multisquamatus	19	157	18.2	CTL	Snake C-type lectin/lectin-like
7	P81017	Snaclec echicetin subunit alpha	Echis carinatus sochureki	63	133	15.8	CTL	Snake C-type lectin/lectin-like
8	A0A0A1WDW9	C-type lectin J	Echis coloratus	22	158	18.3	CTL	Snake C-type lectin/lectin-like
9	B4XSZ9	Snaclec A9	Macrovipera lebetina	6	133	15.6	CTL	Snake C-type lectin/lectin-like
10	P81996	Snaclec echicetin subunit beta	Echis carinatus sochureki	10	123	14.9	CTL	Snake C-type lectin/lectin-like
11	Q8AYA5	Snaclec agglucetin subunit alpha-2	Deinagkistrodon acutus	2	158	18	CTL	Snake C-type lectin/lectin-like
12	Q7T2Q0	Snaclec EMS16 subunit beta	Echis multisquamatus	6	154	17.7	CTL	Snake C-type lectin/lectin-like
13	A0A0A1WD34	C-type lectin B (Fragment)	Echis coloratus	2	113	13.6	CTL	Snake C-type lectin/lectin-like
14	A0A0C5E3E9	C-type lectin-like protein 4A	Macrovipera lebetina	9	158	18	CTL	Snake C-type lectin/lectin-like
15	P82465	Disintegrin EC6 subunit alpha	Echis carinatus sochureki	44	115	12.6	DIS	Disintegrin
16	M9NCG3	Glutaminyl-peptide cyclotransferases	Daboia russelii	13	368	42.1	GpCT	Glutaminyl-peptide cyclotransferase
17	P0C2D6	L-amino-acid oxidase (Fragment)	Protobothrops mucrosquamatus	42	24	2.9	LAOs	L-amino acid oxidase
18	A0A0A1WCY6	Amine oxidase	Echis coloratus	96	504	56.7	LAOs	L-amino acid oxidase
19	Q4F867	L-amino-acid oxidase (Fragments)	Daboia siamensis	68	407	46.3	LAOs	L-amino acid oxidase
20	A0A1L8D615	Amine oxidase	Bothrops atrox	39	502	56.6	LAOs	L-amino acid oxidase
21	R4FID0	Amine oxidase	Denisonia devisi	31	542	61.5	LAOs	L-amino acid oxidase
22	P25428	Venom nerve growth factor	Macrovipera lebetina	22	244	27.3	NGF	Nerve growth factor
23	A0A081DUA8	Nerve growth factor a	Echis coloratus	38	244	27.2	NGF	Nerve growth factor
24	W8EFS0	5'-nucleotidase (Fragment)	Macrovipera lebetina	34	408	45	5'NTD	5'-nucleotidase
25	W8E7D1	Phosphodiesterase	Macrovipera lebetina	39	851	96.1	PDE	Phosphodiesterase
26	T1E6L9	Aminopeptidase	Crotalus horridus	28	934	107.3	AP	Aminopeptidase
27	A0A0F7Z2Q3	Phosphodiesterase	Crotalus adamanteus	23	851	96.3	PDE	Phosphodiesterase
28	E9JGH4	Metalloproteinase (Fragment)	Echis carinatus sochureki	183	248	27.7	P-II SVMP	Snake venom metallopeptidase
29	E9JGH6	Metalloproteinase	Echis carinatus sochureki	16	128	14	P-II SVMP	Snake venom metallopeptidase
30	E9JGH1	Metalloproteinase	Echis carinatus sochureki	54	472	53.6	P-II SVMP	Snake venom metallopeptidase
31	E9JGG8	Metalloproteinase (Fragment)	Echis carinatus sochureki	39	327	36.6	P-II SVMP	Snake venom metallopeptidase
32	T2HRS1	p-II metalloprotease (Fragment)	Protobothrops flavoviridis	8	233	26.6	SVMP	Snake venom metallopeptidase
33	A0A0K8RYV2	Metalloproteinase (Type II) 4c	Crotalus horridus	1	478	53.7	P-II SVMP	Snake venom metallopeptidase
34	E9JG42	Metalloproteinase (Fragment)	Echis carinatus sochureki	172	255	28.3	P-III SVMP	Snake venom metallopeptidase
35	E9JG45	Metalloproteinase (Fragment)	Echis carinatus sochureki	241	276	30.8	P-III SVMP	Snake venom metallopeptidase
36	E9JG52	Metalloproteinase	Echis carinatus sochureki	505	618	69.3	P-III SVMP	Snake venom metallopeptidase
37	E9JG53	Metalloproteinase (Fragment)	Echis carinatus sochureki	94	247	27.8	P-III SVMP	Snake venom metallopeptidase
38	E9JG41	Metalloproteinase	Echis carinatus sochureki	420	607	68.4	P-III SVMP	Snake venom metallopeptidase
39	E9JG29	Metalloproteinase	Echis carinatus sochureki	291	607	68.2	P-III SVMP	Snake venom metallopeptidase
40	E9JG35	Metalloproteinase	Echis carinatus sochureki	170	615	69.1	P-III SVMP	Snake venom metallopeptidase
41	E9JG32	Metalloproteinase	Echis carinatus sochureki	115	412	46.1	P-III SVMP	Snake venom metallopeptidase
42	E9KNB4	Group III snake venom metalloproteinase	Echis carinatus sochureki	66	612	68.6	P-III SVMP	Snake venom metallopeptidase
43	E9JG34	Metalloproteinase	Echis carinatus sochureki	79	610	69.2	P-III SVMP	Snake venom metallopeptidase
44	E9JG26	Metalloproteinase	Echis carinatus sochureki	165	607	68.1	P-III SVMP	Snake venom metallopeptidase
45	E9JG39	Metalloproteinase	Echis carinatus sochureki	146	610	69.5	P-III SVMP	Snake venom metallopeptidase
46	E9JG50	Metalloproteinase (Fragment)	Echis carinatus sochureki	41	369	41.1	P-III SVMP	Snake venom metallopeptidase
47	E9JG30	Metalloproteinase	Echis carinatus sochureki	140	612	68.7	P-III SVMP	Snake venom metallopeptidase
48	E9JG92	Metalloproteinase	Echis coloratus	56	616	69.3	P-III SVMP	Snake venom metallopeptidase
49	E9JG83	Metalloproteinase	Echis coloratus	77	618	69.8	P-III SVMP	Snake venom metallopeptidase
50	E9KJZ6	Group III snake venom metalloproteinase (Fragment)	Echis ocellatus	100	553	62.6	P-III SVMP	Snake venom metallopeptidase
51	E9JG58	Metalloproteinase (Fragment)	Echis coloratus	46	505	56.4	P-III SVMP	Snake venom metallopeptidase
52	A0A0A1WD06	Snake venom metalloproteinase K (Fragment)	Echis coloratus	22	435	48.8	P-III SVMP	Snake venom metallopeptidase
53	E9KJY0	Group III snake venom metalloproteinase	Echis ocellatus	28	639	71.7	P-III SVMP	Snake venom metallopeptidase
54	A0A2H4Z2X4	DSAIP (Fragment)	Daboia siamensis	44	619	69.1	P-III SVMP	Snake venom metallopeptidase
55	E9JGA4	Metalloproteinase	Echis coloratus	69	614	68.8	P-III SVMP	Snake venom metallopeptidase
56	A0A1L8D641	BATXSVMPIII9	Bothrops atrox	1	604	67.7	P-III SVMP	Snake venom metallopeptidase
57	A0A194AQ28	Metalloproteinase type III 11	Sistrurus miliarius barbouri	7	606	67.7	P-III SVMP	Snake venom metallopeptidase
58	Q4QT06	Metalloproteinase MP-2 (Fragment)	Bitis arietans	7	513	57.4	P-III SVMP	Snake venom metallopeptidase
59	A0A194APS0	Phospholipase A2 3c	Agkistrodon piscivorus	22	138	15.6	PLA2	Phospholipase A2
60	A0A0A1WDU0	Phospholipase B-like	Echis coloratus	8	553	64.5	PLB	Phospholipase B
61	A0A182C6E9	Phospholipase B-like	Phalotris mertensi	8	553	64.4	PLB	Phospholipase B
62	Q18DC8	Renin-like aspartic protease	Echis ocellatus	18	395	43.8	RLAP	Renin-like aspartic protease
63	A0A0A1WDP8	Renin (Fragment)	Echis coloratus	4	113	12.1	RLAP	Renin-like aspartic protease
64	E9JG22	Serine protease (Fragment)	Echis carinatus sochureki	85	232	25.5	SVSPs	Snake venom serine proteinase
65	E9JG14	Serine protease (Fragment)	Echis carinatus sochureki	70	237	26.2	SVSPs	Snake venom serine proteinase
66	E9JFZ9	Serine protease (Fragment)	Echis carinatus sochureki	23	233	25.5	SVSPs	Snake venom serine proteinase
67	E9JG23	Serine protease (Fragment)	Echis coloratus	11	260	28.4	SVSPs	Snake venom serine proteinase
68	A0A1W7RB99	Cadam10_SVSP-1	Crotalus adamanteus	4	260	28.9	SVSPs	Snake venom serine proteinase
69	E9JFZ5	Serine protease (Fragment)	Echis pyramidum leakeyi	8	208	22.9	SVSPs	Snake venom serine proteinase
70	A0A194APA8	Serine proteinase 3	Agkistrodon piscivorus	19	258	28.2	SVSPs	Snake venom serine proteinase
71	Q91053	Thrombin-like enzyme calobin-1	Gloydius ussuriensis	8	262	28.9	SVSPs	Snake venom serine proteinase
72	A1E237	Venom thrombin-like enzyme (Fragment)	Deinagkistrodon acutus	31	235	25.5	SVSPs	Snake venom serine proteinase
73	P81038	Thrombin-like enzyme cerastotin (Fragments)	Cerastes cerastes	36	98	11.1	SVSPs	Snake venom serine proteinase
74	A0A0A1WDS7	Serine protease A (Fragment)	Echis coloratus	21	90	10.6	SVSPs	Snake venom serine proteinase
75	E9JG20	Serine protease (Fragment)	Echis pyramidum leakeyi	14	236	26.3	SVSPs	Snake venom serine proteinase
76	A0A286S0E1	Venom plasminogen activator 4	Gloydius intermedius	4	258	28.1	SVSPs	Snake venom serine proteinase
77	A0A194APJ3	Serine proteinase 6	Agkistrodon piscivorus	4	258	28.1	SVSPs	Snake venom serine proteinase
78	E9JG06	Serine protease (Fragment)	Echis pyramidum leakeyi	17	258	28.3	SVSPs	Snake venom serine proteinase
79	E9JG17	Serine protease (Fragment)	Echis coloratus	32	235	25.4	SVSPs	Snake venom serine proteinase
80	A0A194ASU5	Serine proteinase 12a	Sistrurus miliarius barbouri	2	257	28.1	SVSPs	Snake venom serine proteinase
81	A0A1Y0DIB5	Serine protease	Azemiops feae	7	258	28.3	SVSPs	Snake venom serine proteinase
82	E5L0E3	Alpha-fibrinogenase-like	Daboia siamensis	26	258	28.5	SVSPs	Snake venom serine proteinase
83	A0A194AM91	Serine proteinase 1	Agkistrodon piscivorus	5	257	28.1	SVSPs	Snake venom serine proteinase
84	E9JG01	Serine protease (Fragment)	Echis coloratus	28	258	28.3	SVSPs	Snake venom serine proteinase
85	D5KRY0	Serine protease (Fragment)	Echis ocellatus	15	258	28.2	SVSPs	Snake venom serine proteinase
86	A0A0A1WDM9	Serine protease D	Echis coloratus	9	260	28.8	SVSPs	Snake venom serine proteinase
87	T1DEE8	Kallikrein-CohPH-2	Crotalus oreganus helleri	14	266	29.9	SVSPs	Snake venom serine proteinase
88	Q71QI2	Snake venom serine protease CL2	Trimeresurus stejnegeri	10	258	27.8	SVSPs	Snake venom serine proteinase
89	A0A2I7YS46	Serine endopeptidase	Crotalus lepidus	2	258	28.3	SVSPs	Snake venom serine proteinase
90	A0A194APK4	Serine proteinase 6b	Sistrurus tergeminus	4	262	28.9	SVSPs	Snake venom serine proteinase
91	Q71QH8	Serine protease CL4	Trimeresurus stejnegeri	6	257	28.9	SVSPs	Snake venom serine proteinase

## Sheet: S-8
Table S8. List of Protein identified from the mixed three population of Echis carinatus sockureki (IRAN) venom using the direct RPLC-MS/MS top-down proteomics technique. Mixed whole venom of Ecs populations were directly subjected to RPLC-MS/MS analyses in reduced and non-reduced forms. Protein families identification of top-down MS/MS data were accomplished by TopPIC suite software package (vers…
Mixed Whole venoms_TD
	Accession	Description	Organism	first residue	last residue	proteoform	E-value	Protein Classes
1	sp|B6EWW8	V5NTD_GLOBR Snake venom 5'-nucleotidase	Gloydius brevicaudus	41	77	G.SFELTILHTNDVHARVEQTSRDSGKCTGQDCYGGVAR.R	1.20353e-10	5'NTD	5'-nucleotidase
2	sp|F8S0Z7	V5NTD_CROAD Snake venom 5'-nucleotidase	Crotalus adamanteus	78	107	R.RATKIRELRAKHRHVLLLDAGDQYQGTVWF.N	6.42576e-18	5'NTD	5'-nucleotidase
3	tr|A0A0B8RXZ9	A0A0B8RXZ9_BOIIR Snake venom 5'-nucleotidase	Boiga irregularis	40	77	A.GSFELTILHTNDVHARVEQTSRDSGKCTGQDCYGGVAR.R	1.45283e-15	5'NTD	5'-nucleotidase
4	tr|A0A0F7YZM6	A0A0F7YZM6_MICFL Ecto-5'-nucleotidase 1a	Micrurus fulvius	45	77	L.TILHTNDVHARVEQTSRDSGKCTREDCYGGVAR.R	4.76314e-07	5'NTD	5'-nucleotidase
5	tr|A0A182C5T8	A0A182C5T8_9SAUR 5nucleotidase (Fragment)	Phalotris mertensi	62	105	F.KGREVVQFMNSLRYDAMALGNHEFDNGLDGLLDPLLKHVNFPIL.S	9.52564e-19	5'NTD	5'-nucleotidase
6	tr|A0A194APR8	A0A194APR8_SISTE Ecto-5'-nucleotidase	Sistrurus tergeminus	41	78	A.GSFELTILHTNDVHARVEQTSRDSGKCTGQDCYGGVAR.R	5.89981e-12	5'NTD	5'-nucleotidase
7	tr|A0A1W7RF85	A0A1W7RF85_AGKCO Snake venom 5'-nucleotidase	Agkistrodon contortrix contortrix	40	83	A.GSFELTILHTNDVHARVEQTSRDSGKCTGQDCYGGVARRATKIR.E	4.89496e-08	5'NTD	5'-nucleotidase
8	tr|A0A2I4HXH5	A0A2I4HXH5_NAJAT Venom 5'-nucleotidase	Naja atra	1	44	.GSFELTILHTNDVHARLEQTSRDSGKCTGEDCYGGVARRATKIR.Q	2.85569e-08	5'NTD	5'-nucleotidase
9	tr|A0A0F7ZB46	A0A0F7ZB46_CROAD Aminopeptidase	Crotalus adamanteus	41	67	F.PWDKIRLPKYVVPVHYDLLIHPNLTTL.A	4.16197e-09	AP	Aminopeptidase
10	sp|P0C7J9	BP11A_CROAD Bradykinin-potentiating peptide 11a	Crotalus adamanteus	1	11	.QQWPPGHHIPP.	0.000206	BPPs	Bradykinin-potentiating-C-type natriuretic peptides
11	sp|P0DJK4	BPPBF_BOTCO Bradykinin-potentiating peptide 11f	Bothrops cotiara	1	11	.QNAHPSPKVPP.	9.78621e-06	BPPs	Bradykinin-potentiating-C-type natriuretic peptides
12	sp|P85038	BPP2_GLOHA Bradykinin-potentiating peptide 2	Gloydius halys	1	11	.QGRPPRPHIPP.	0.000314	BPPs	Bradykinin-potentiating-C-type natriuretic peptides
13	sp|P85169	BPPDB_BOTJA Bradykinin-potentiating peptide 13b	Bothrops jararaca	3	13	G.GLPRPGPEIPP.	2.7357e-06	BPPs	Bradykinin-potentiating-C-type natriuretic peptides
14	sp|B7FDI0	CRVP_VIPNI Cysteine-rich venom protein (Fragment)	Vipera nikolskii	2	27	G.NVDFDSESPRKPEIQNEIIDLHNSLR.R	4.74472e-19	CRISP	Cysteine-rich secretory protein
15	sp|B7FDI1	CRVP_VIPBE Cysteine-rich venom protein	Vipera berus	6	45	L.VLPILAAVLQQSSGNVDFDSESPRKPEIQNEIIDLHNSLR.R	1.8507e-08	CRISP	Cysteine-rich secretory protein
16	sp|P0DMT4	CRVP_ECHCO Cysteine-rich venom protein	Echis coloratus	1	38	.NVDFDSESPRKPEIQNEIIDLHNSLRRSVNPTASNMLR.M	6.04148e-26	CRISP	Cysteine-rich secretory protein
17	sp|P79845	CRVP_PROMU Cysteine-rich venom protein	Protobothrops mucrosquamatus	20	45	G.NVDFDSESPRKPEIQNEIIDLHNSLR.R	5.01203e-12	CRISP	Cysteine-rich secretory protein
18	sp|Q7ZTA0	CRVP_AGKPI Cysteine-rich venom protein piscivorin	Agkistrodon piscivorus piscivorus	142	152	Y.KSYLVGCAAAY.C	0.00197	CRISP	Cysteine-rich secretory protein
19	sp|Q8JI39	CRVP_PROFL Cysteine-rich venom protein triflin	Protobothrops flavoviridis	21	45	N.VDFDSESPRKPEIQNEIIDLHNSLR.R	3.04036e-12	CRISP	Cysteine-rich secretory protein
20	tr|A0A077L7I7	A0A077L7I7_PROFL Cysteine-rich venom protein (Fragment)	Protobothrops flavoviridis	26	64	V.LPILAAVLQQSSGNVDFDSESPRKPEIQNEIIDLHNSLR.R	1.14886e-12	CRISP	Cysteine-rich secretory protein
21	tr|A0A077LA61	A0A077LA61_PROEL Cysteine-rich venom protein	Protobothrops elegans	6	45	I.VLPILAAVLQQSSGNVDFDSESPRKPEIQNEIIDLHNSLR.R	1.49938e-07	CRISP	Cysteine-rich secretory protein
22	tr|A0A0A1WCN2	A0A0A1WCN2_ECHCO Cysteine-Rich Secretory Protein B	Echis coloratus	20	73	G.NVDFDSESPRKPEIQNEIIDLHNSLRRSVNPTASNMLRMEWYPEAAANAERWAF.R	4.99511e-17	CRISP	Cysteine-rich secretory protein
23	tr|A0A1I9KNM0	A0A1I9KNM0_VIPAA Cysteine-rich secretory protein CRISP-1	Vipera ammodytes ammodytes	4	46	A.FIVLPILAAVLQQSSGSVDFDSESPRKPEIQNEIIDLHNSLRR.S	1.0877e-07	CRISP	Cysteine-rich secretory protein
24	sp|P0C6R5	VM2MU_ECHML Disintegrin multisquamatin	Echis multisquamatus	1	52	.EGEECESGPCCRNCKFLKEGTICKRARGDDMDDYCNGKTCDCPRNPHKGPAT.	1.83751e-24	DIS	Disintegrin
25	sp|P0C6R7	VM2PA_ECHPL Disintegrin pyramidin-A	Echis pyramidum leakeyi	1	23	.DCASGPCCRDCKFLKEGTICKRA.R	0.000577	DIS	Disintegrin
26	sp|P17347	VM2EA_ECHCS Disintegrin echistatin-alpha	Echis carinatus sochureki	1	49	.QCESGPCCRNCKFLKEGTICKRARGDDMDDYCNGKTCDCPRNPHKGPAT.	2.61893e-27	DIS	Disintegrin
27	tr|V8NXL2	V8NXL2_OPHHA Fibroblast growth factor 19 (Fragment)	Ophiophagus hannah	137	154	Q.LPPFSQFLPLINKIPLEP.M	0.000164	FGF	Fibroblast growth factor
28	sp|A7ISW1	QPCT_BOIIR Glutaminyl-peptide cyclotransferase	Boiga irregularis	79	122	L.IERYPGSPGSYAVRQHIKHRLQGLQAGWLVEEDTFQSHTPYGYR.T	5.79663e-26	GpCT	Glutaminyl-peptide cyclotransferase
29	sp|Q90YA8	QPCT_GLOBL Glutaminyl-peptide cyclotransferase	Gloydius blomhoffii	123	145	R.TFSNIISTLNPLAKRHLVIACHY.D	2.69542e-13	GpCT	Glutaminyl-peptide cyclotransferase
30	tr|A0A098LZZ5	A0A098LZZ5_9SAUR Glutaminyl-peptide cyclotransferase	Hypsiglena sp.	176	187	L.ARSLDRQLSFLK.Q	0.000125	GpCT	Glutaminyl-peptide cyclotransferase
31	tr|A0A0K8S0L7	A0A0K8S0L7_CROHD Glutaminyl-peptide cyclotransferases	Crotalus horridus	11	122	A.ATFFCLAWTLCLALPGFPQHVSGREDRADWTQEKYSHRPTILNATCLLQVTSQTNVDRMWQNDLHPILIERYPGSPGSYAVRQHIKHRLQGLQAGWLVEEDTFQSHTPYGYR.T	2.1148e-05	GpCT	Glutaminyl-peptide cyclotransferase
32	tr|A0A1W7RH88	A0A1W7RH88_AGKCO Glutaminyl-peptide cyclotransferase	Agkistrodon contortrix contortrix	123	190	R.TFSNIISTLNPLAKRHLVIACHYDSKYFPPQLDGKVFVGATDSAVPCAMILELARSLDRQLSFLKQSS.L	0.000174	GpCT	Glutaminyl-peptide cyclotransferase
33	tr|J3S3V2	J3S3V2_CROAD Glutaminyl-peptide cyclotransferases	Crotalus adamanteus	319	359	R.RGVPILHLIPSPFPRVWHTMEDNEENLDKPTIDNLSKILQV.F	2.22549e-09	GpCT	Glutaminyl-peptide cyclotransferase
34	tr|M9NCD2	M9NCD2_CERGO Glutaminyl-peptide cyclotransferases	Cerrophidion godmani	1	108	.MARERRDSKAATFFCLAWALCLALPGFPQHYSHRPTILNATCILQVTSQTNVNRMWQNDLHPILIERYPGSPGSYAVRQHIKHRLQGLQAGWLVEEDTFQSHTPYGYR.T	4.78756e-09	GpCT	Glutaminyl-peptide cyclotransferase
35	tr|M9NCG3	M9NCG3_DABRR Glutaminyl-peptide cyclotransferases	Daboia russelii	319	368	R.RGVPILHLIPSPFPRVWHVMEDNEENLDKPTIDNLSKILQIFVLEYLNLG.	4.28825e-30	GpCT	Glutaminyl-peptide cyclotransferase
36	tr|M9NCR9	M9NCR9_CERGO Glutaminyl-peptide cyclotransferases	Cerrophidion godmani	2	114	M.ARERRDSKAAAFFCLARGEASRVPEKTERTGLRRSIPHRPIILNATSILQVTLQTNVSRMWQNDLHPIMIERYPGSPGSYAVRQHIRHRLQGLQAGWLVEEDTFQSHTPYGYR.T	0.0011	GpCT	Glutaminyl-peptide cyclotransferase
37	tr|M9ND08	M9ND08_MICFL Glutaminyl-peptide cyclotransferases	Micrurus fulvius	123	188	R.TFSNIISTLNPLAKRHLVVACHYDSKYFPPQLDGKVFVGATDSAVPCAMMLELARSLDRQLSSLKQ.S	0.000633	GpCT	Glutaminyl-peptide cyclotransferase
38	tr|T1DH29	T1DH29_CROHD Glutaminyl-peptide cyclotransferase	Crotalus horridus	79	122	L.IERYPGSPGSYAVRQHIKHRLQGLQAGWLVEEDTFQSHTPYGYR.T	1.72757e-11	GpCT	Glutaminyl-peptide cyclotransferase
39	tr|U3FZH0	U3FZH0_MICFL Glutaminyl cyclase	Micrurus fulvius	79	122	L.IERYPGSPGSYAVRQHIKHRLQGLQAGWLVEEDTFQSHTPYGYR.T	2.92661e-19	GpCT	Glutaminyl-peptide cyclotransferase
40	tr|U3TAD9	U3TAD9_PROFL Glutaminyl cyclase	Protobothrops flavoviridis	11	54	L.IERYPGSPGSYAVRQHIKHRLQGLQAGWLVEEDTFQSHTPYGYR.T	1.6592e-07	GpCT	Glutaminyl-peptide cyclotransferase
41	tr|U3TBM3	U3TBM3_OVOOK Glutaminyl_cyclase (Fragment)	Ovophis okinavensis	306	355	R.RGVPILHLIPSPFPRIWHTMEDNEENLDKPTIDNLSKILQVFVLEYLNLG.	1.32352e-18	GpCT	Glutaminyl-peptide cyclotransferase
42	tr|U3TDL2	U3TDL2_OVOOK Glutaminyl_cyclase (Fragment)	Ovophis okinavensis	320	369	R.RGVPILHLIPSPFPRIWHTMEDNEENLDKPTIDNLSKILQVFVLEYLNLG.	2.63274e-19	GpCT	Glutaminyl-peptide cyclotransferase
43	sp|A3QVN2	HYAL_ECHOC Hyaluronidase	Echis ocellatus	255	277	L.EIILRSSDNALKFVHHRLKESMR.I	5.31668e-09	Hyal	Hyaluronidase
44	sp|A0A024BTN9	OXLA_BOTSC L-amino acid oxidase Bs29 (Fragment)	Bothriechis schlegelii	1	138	.SCADDRNPLEECFQETDYEEFLEIARNGLKATSNPKHVVIVGAGMSGLSAAYVLAGAGHQVTVLEASERAGGRVRTYRNDKEGWYANLGPMRLPEKHRIVREYITKFGLQLNEFSQENENAWYFIKNIRKRVGEVKKD.P	1.06558e-15	LAOs	L-amino acid oxidase
45	sp|A8QL52	OXLA_BUNFA L-amino-acid oxidase	Bungarus fasciatus	20	86	A.DDRRSALEECFREADYEEFLEIARNGLKKTSNPKHVVVVGAGMAGLSAAYVLAGAGHRVTLLEASDR.V	0.000545	LAOs	L-amino acid oxidase
46	sp|A8QL58	OXLA_NAJAT L-amino-acid oxidase (Fragment)	Naja atra	121	131	Y.IRKFGLKLNEF.F	0.00733	LAOs	L-amino acid oxidase
47	sp|B0VXW0	OXLA_SISCA L-amino-acid oxidase	Sistrurus catenatus edwardsii	317	340	A.ARRIKFEPPLPPKKAHALRSVHYR.S	2.95494e-06	LAOs	L-amino acid oxidase
48	sp|B5AR80	OXLA_BOTPA L-amino-acid oxidase (Fragment)	Bothrops pauloensis	243	315	D.DIFAYEKRFDEIVGGMDKLPTSMYQAIQEKVRLNVRVIKIQQDVKEVTVTYQTSAKETLSVTADYVIVCTTSR.A	6.80825e-25	LAOs	L-amino acid oxidase
49	sp|B5U6Y8	OXLA_ECHOC L-amino-acid oxidase	Echis ocellatus	243	340	D.DIFAYEKRFDEIVGGMDQLPTSMYRAIEKSVLFKARVTKIQQNAEKVRVTYQTAAKTLSDVTADYVIVCTTSRAARRINFKPPLPPKKAHALRSVHYR.S	4.57946e-14	LAOs	L-amino acid oxidase
50	sp|F8S0Z5	OXLA2_CROAD L-amino-acid oxidase	Crotalus adamanteus	245	340	G.YEKRFDEIVGGMDQLPTSMYEAIKEKVQVHFNARVIEIQQNDREATVTYQTSANEMSSVTADYVIVCTTSRAARRIKFEPPLPPKKAHALRSVHYR.S	9.97842e-09	LAOs	L-amino acid oxidase
51	sp|G8XQX1	OXLA_DABRR L-amino-acid oxidase	Daboia russelii	20	85	A.DDKNPLEECFREDDYEEFLEIAKNGLKKTSNPKHIVIVGAGMSGLSAAYVLAGAGHKVTVLEASER.P	7.06096e-29	LAOs	L-amino acid oxidase
52	sp|J7H670	OXLA_LACMT L-amino acid oxidase Lm29	Lachesis muta	308	340	Y.VIVCTTSRATRRITFEPPLPPKKAHALRSVHYR.S	1.8938e-07	LAOs	L-amino acid oxidase
53	sp|K9N7B7	OXLA_CRODM L-amino acid oxidase Cdc18 (Fragment)	Crotalus durissus cumanensis	234	324	F.DEIVGGMDQLPTSMYEAIKEKVQVHFNARVIEIQQNDRETKVTYQTSANEMPSVTADYVIVCTTSRAARRIKFEPPLPPKKAHALRSVHYR.S	1.07776e-10	LAOs	L-amino acid oxidase
54	sp|O93364	OXLA_CROAD L-amino-acid oxidase	Crotalus adamanteus	245	340	G.YEKRFDEIVGGMDQLPTSMYEAIKEKVQVHFNARVIEIQQNDREATVTYQTSANEMSSVTADYVIVCTTSRAARRIKFEPPLPPKKAHALRSVHYR.S	6.61206e-10	LAOs	L-amino acid oxidase
55	sp|P0C2D6	OXLA_PROMU L-amino-acid oxidase (Fragment)	Protobothrops mucrosquamatus	2	24	A.DNKNPLEECFRETNYEEFLEIAR.	6.72522e-09	LAOs	L-amino acid oxidase
56	sp|P0C2D7	OXLA_VIPBB L-amino-acid oxidase (Fragments)	Vipera berus berus	71	88	F.FAGEYTANAHGWIDSTIK.	9.95289e-15	LAOs	L-amino acid oxidase
57	sp|P0DI84	OXLA_VIPAA L-amino-acid oxidase	Vipera ammodytes ammodytes	1	65	.DRNPLEECFRETDYEEFLEIARNGLKKTSNPKHVVVVGAGMSGLSAAYVLAGAGHKVTVLEASER.A	3.07301e-29	LAOs	L-amino acid oxidase
58	sp|P81382	OXLA_CALRH L-amino-acid oxidase	Calloselasma rhodostoma	236	251	F.IESLKHDDIFAYEKRF.D	1.66203e-12	LAOs	L-amino acid oxidase
59	sp|Q4F867	OXLA_DABSI L-amino-acid oxidase (Fragments)	Daboia siamensis	316	407	F.NDLSSIHQLPKKDLQTFCYPSIIQKWSLDKYAMGAITTFTPYQFQHFSEALTAPVGRIFFAGEYTANAHGWIDSTIKSGLTAARDVNRASEL.	8.36258e-18	LAOs	L-amino acid oxidase
60	sp|Q4JHE3	OXLA_OXYSC L-amino-acid oxidase	Oxyuranus scutellatus scutellatus	308	336	D.YVIVCSSSRAARRIYFEPPLPPKKAHALR.S	5.08328e-06	LAOs	L-amino acid oxidase
61	sp|Q6STF1	OXLA_GLOHA L-amino-acid oxidase	Gloydius halys	317	340	A.TRRIKFEPPLPPKKAHALRSVHYR.S	2.01473e-21	LAOs	L-amino acid oxidase
62	sp|Q6TGQ8	OXLA_BOTMO L-amino-acid oxidase (Fragment)	Bothrops moojeni	220	328	Y.YVSFIESLKHDDIFAYEKRFDEIVGGMDKLPTSMYQAIQEKVHLNARVIKIQQDVKEVTVTYQTSEKETLSVTADYVIVCTTSRAARRIKFEPPLPPKKAHALRSVHYR.S	3.48177e-17	LAOs	L-amino acid oxidase
63	sp|Q6TGQ9	OXLA_BOTJR L-amino-acid oxidase (Fragment)	Bothrops jararacussu	231	335	F.IESLKHDDIFAYEKRFDEIVGGMDKLPTSMYQAIQEKVHLNARVIKIQQDVKEVTVTYQTSEKETLSVTADYVIVCTTSRAARRIKFEPPLPPKKAHALRSVHYR.S	1.42278e-13	LAOs	L-amino acid oxidase
64	sp|X2L4E2	OXLA_BOTPC L-amino acid oxidase (Fragment)	Bothrops pictus	229	308	F.IESLKHDDIFAYEKRFDEIVGGMDKLPTSMYQAIQEKVHLNARVIEIQQDVKEVTVTYQTSQKETLSVTADYVIVCTTSR.A	3.62647e-16	LAOs	L-amino acid oxidase
65	tr|A0A068EPZ2	A0A068EPZ2_GLOIT Amine oxidase	Gloydius intermedius	267	315	Y.RAIEEKVHLNAQVIKIQKNAEKVTVVYQTPAKEMASVTADYVIVCTTSR.A	0.00107	LAOs	L-amino acid oxidase
66	tr|A0A077L6L4	A0A077L6L4_PROEL Amine oxidase	Protobothrops elegans	243	315	D.DIFAYEKRFDEIVGGMDQLPTSMYRAIEEKVRFNTRVIKIQQNAKKVTVTYQTRAKDTSLVTADYVIVCTTSR.A	5.5941e-19	LAOs	L-amino acid oxidase
67	tr|A0A098LWS4	A0A098LWS4_PYTRG Amine oxidase	Python regius	32	85	D.PDYEEYLEIARNGLKKTSRSKHVVVVGAGMAGLSAAYTLAQAGHKVTVLEASER.V	4.19599e-05	LAOs	L-amino acid oxidase
68	tr|A0A098LX00	A0A098LX00_PANGU Amine oxidase	Pantherophis guttatus	19	85	C.ADDRSPLEECFKEDDYEEFLEIARNGLKQTSNPKHVVVVGAGMAGLSAAYVLAGAGHKVTVLEASER.V	1.17847e-16	LAOs	L-amino acid oxidase
69	tr|A0A0A1WCY6	A0A0A1WCY6_ECHCO Amine oxidase	Echis coloratus	37	85	E.FLEIARNGLKKTSNPKDIVVVGAGMSGLSAAYVLAGAGHKVTVLEASER.V	3.60548e-41	LAOs	L-amino acid oxidase
70	tr|A0A0A1WDN5	A0A0A1WDN5_ECHCO L-amino acid oxidase B variant 2	Echis coloratus	19	85	C.ADDKNPLEECFREADYEEFLEIARNGLKKTSNPKDIVVVGAGMSGLSAAYVLAGAGHKVTVLEASER.V	7.67539e-20	LAOs	L-amino acid oxidase
71	tr|A0A0K8RYS7	A0A0K8RYS7_CROHD L-amino-acid oxidase	Crotalus horridus	245	340	G.YEKRFDEIVGGMDQLPTSMYEAIKEKVQVHFNARVIEIQQNDREATVTYQTSANEMSSVTADYVIVCTTSRAARRIKFEPPLPPKKAHALRSVHYR.S	2.57445e-09	LAOs	L-amino acid oxidase
72	tr|A0A0K8S046	A0A0K8S046_CROHD L-amino acid oxidase	Crotalus horridus	250	340	F.DEIVGGMDQLPTSMYEAIKEKVQVHFNARVIEIQQNDREATVTYQTSANEMSSVTADYVIVCTTSRAARRIKFEPPLPPKKAHALRSVHYR.S	6.59292e-06	LAOs	L-amino acid oxidase
73	tr|A0A0S1LJ33	A0A0S1LJ33_BOTAT Amine oxidase (Fragment)	Bothrops atrox	225	333	Y.YVSFIESLKHDDIFAYEKRFDEIVGGMDKLPTSMYQAIQEKVHLNARVIKIQQDVKEVTVTYQTSEKETLSVTADYVIVCTTSRAARRIKFEPPLPPKKAHALRSVHYR.S	1.43661e-08	LAOs	L-amino acid oxidase
74	tr|A0A194APV2	A0A194APV2_9SAUR L-amino acid oxidase	Agkistrodon piscivorus	268	340	R.AIEEKVRFNARVIKIQQNDREVTVTYQTSANEMLPVTADYVIVCTTSRATRRIKFEPPLPPKKAHALRSVHYR.S	2.9144e-10	LAOs	L-amino acid oxidase
75	tr|A0A194ARU8	A0A194ARU8_SISTE L-amino acid oxidase 1c	Sistrurus tergeminus	321	342	R.RIKFEPPLPPKKAHALRSVHYR.S	0.00699	LAOs	L-amino acid oxidase
76	tr|A0A194AS07	A0A194AS07_SISMB L-amino acid oxidase 1b	Sistrurus miliarius barbouri	327	340	L.PPKKAHALRSVHYR.S	0.000413	LAOs	L-amino acid oxidase
77	tr|A0A194ATK4	A0A194ATK4_SISTE L-amino acid oxidase 1d	Sistrurus tergeminus	80	342	V.LEASERAGGRVQTYRNDREGWYANLGPMRLPEKHRIVREYIRKFGLELNEFFQENDNAWYFIKNIRKRVQEVKNNPGLLKYPVKPSEKGKSAGQLYEESLRKVVEELRSTNCKYILDKYDTYSTKEYLLKEGNLSPGAVDMIGDLLNEDSGYYVSFIESLKHDDIFGYEKRFDEIVGGMDQLPTSMYEAIKEKVQVHFNARVIEIQQNDTEATVTYQTSANEMSSVTADYVIVCTTSRAARRIKFEPPLPPKKAHALRSVHYR.S	0.000644	LAOs	L-amino acid oxidase
78	tr|A0A194ATU0	A0A194ATU0_SISMB L-amino acid oxidase 1a	Sistrurus miliarius barbouri	19	153	C.ADDRNPLEECFRETDYEEFLEIAKNGLTATSNPKRVVIVGAGMSGLSAAYVLAGAGHQVTVLEASERVGGRVRTYRKEDWYANLGPMRLPTKHSIVREYVKKFGLELNEFFQENDNAWYFIKNIRKRVREVKNNP.G	2.89989e-17	LAOs	L-amino acid oxidase
79	tr|A0A1L8D615	A0A1L8D615_BOTAT Amine oxidase	Bothrops atrox	252	315	F.DEIVGGMDKLPTSMYQAIQEKVHLNARVIKIQQDVKEVTVTYQTSAKETLSATADYVIVCTTSR.A	8.84452e-08	LAOs	L-amino acid oxidase
80	tr|A0A1L8D690	A0A1L8D690_BOTAT Amine oxidase	Bothrops atrox	232	340	Y.YVSFIESLKHDDIFAYEKRFDEIVGGMDKLPTSMYQAIQEKVHLNARVIKIQQDVKEVTVTYQTSEKETLSVTADYVIVCTTSRAARRIKFEPPLPPKKAHALRSVHYR.S	1.7276e-14	LAOs	L-amino acid oxidase
81	tr|A0A1W7RGB3	A0A1W7RGB3_AGKCO L-amino acid oxidase	Agkistrodon contortrix contortrix	268	340	R.AIEEKVRFNARVIEIQQNDREVTVTYQTSANEMLPVTADYVIVCTTSRATRRIKFEPPLPPKKAHALRSVHYR.S	1.81591e-05	LAOs	L-amino acid oxidase
82	tr|A0A2H4N3D4	A0A2H4N3D4_BOTMO Amine oxidase (Fragment)	Bothrops moojeni	236	340	F.IESLKHDDIFAYEKRFDEIVGGMDKLPTSMYQAIQEKVHLNARVIKIQQDVKEVTVTYQTSEKETLSVTADYVIVCTTSRAARRIKFEPPLPPKKAHALRSVHYR.S	7.03505e-16	LAOs	L-amino acid oxidase
83	tr|E9JG38	E9JG38_ECHCS Metalloproteinase	Echis carinatus sochureki	195	279	E.QHSYYDYFRYVKVIVVVDHSMCTKYNNDLTAMRTRVYEMFNTVNEIYIYMHIHVPLVGIEFWCNGDLITVTSSAENTLYSFGDWR.A	8.99247e-10	LAOs	L-amino acid oxidase
84	tr|R4FID0	R4FID0_DENDV Amine oxidase	Denisonia devisi	89	131	G.GRVNTYRNETEGWYVNLGPMRLPERHRIIREYIKKFGLKLNEF.L	2.13377e-09	LAOs	L-amino acid oxidase
85	tr|T1E6V1	T1E6V1_CROOH LAAO-CohPH-1	Crotalus oreganus helleri	18	84	V.HMTETPLEECFRETDYEEFLEIAKNGLTATSNPKRVVIVGAGMAGLSAAYVLAGAGHQVTVLEASER.V	3.66227e-14	LAOs	L-amino acid oxidase
86	tr|T2HQ57	T2HQ57_OVOOK Amine oxidase	Ovophis okinavensis	236	315	F.IESLKHDDIFAYEKRFDEIVGGMDQLPTCMCRAIEEKVHFNARVIKIQQDAKKVTVTYQTPAKDTSLVTADYVIVCTTSR.A	1.72486e-12	LAOs	L-amino acid oxidase
87	tr|T2HQ90	T2HQ90_PROFL L-amino acid oxidasese (Fragment)	Protobothrops flavoviridis	20	102	A.DDRNPLEECFRETDYEEFLEIARNGLKKTSNPKHVVIVGAGMSGLSAAYVLAGAGHQVTVLEASERAGGRVRTYRNDKEGWYA.N	5.65343e-07	LAOs	L-amino acid oxidase
88	tr|T2HRS5	T2HRS5_PROFL Amine oxidase	Protobothrops flavoviridis	243	315	D.DIFAYEKRFDEIVGGMDQLPTSMYQAIEEKVRFNTRVIKIQQNAKKVTVTYQTPAKDTSLVTADYVIVCTTSR.A	2.75124e-26	LAOs	L-amino acid oxidase
89	tr|A0A0K8RYS7	A0A0K8RYS7_CROHD L-amino-acid oxidase	Crotalus horridus	245	340	G.YEKRFDEIVGGMDQLPTSMYEAIKEKVQVHFNARVIEIQQNDREATVTYQTSANEMSSVTADYVIVCTTSRAARRIKFEPPLPPKKAHALRSVHYR.S	2.57445e-09	LAOs	L-amino acid oxidase
90	tr|A0A0K8S046	A0A0K8S046_CROHD L-amino acid oxidase	Crotalus horridus	250	340	F.DEIVGGMDQLPTSMYEAIKEKVQVHFNARVIEIQQNDREATVTYQTSANEMSSVTADYVIVCTTSRAARRIKFEPPLPPKKAHALRSVHYR.S	6.59292e-06	LAOs	L-amino acid oxidase
91	sp|P59170	PA2A4_ECHCS Acidic phospholipase A2 4	Echis carinatus sochureki	74	83	C.SPKMTLYSYR.F	0.00252	Acidic PLA2	Phospholipase A2
92	sp|Q7T3S7	PA2A1_ECHCA Acidic phospholipase A2 EC-I	Echis carinatus	57	69	T.DRCCLVHDCCYTR.V	3.44362e-12	Acidic PLA2	Phospholipase A2
93	tr|Q6T5K9	Q6T5K9_GLOSH Acidic phospholipase A2 (Fragment)	Gloydius shedaoensis	1	122	.SLVQFETLIMKIAGRSGIWYYGSYGCYCGAGGQGRPQDASDRCCFVHDCCYGKVTGCDPKMDVYTYTEENGAIVCGGDDPCKKQICECDKDAAICFRDNIDTYDNKYWFFPAKNCQEESEPC.	0.000687	Acidic PLA2	Phospholipase A2
94	sp|P48650	PA2HS_ECHCA Basic phospholipase A2 homolog ecarpholin S	Echis carinatus	1	122	.SVVELGKMIIQETGKSPFPSYTSYGCFCGGGERGPPLDATDRCCLAHSCCYDTLPDCSPKTDRYKYKRENGEIICENSTSCKKRICECDKAVAVCLRKNLNTYNKKYTYYPNFWCKGDIEKC.	1.85036e-51	Basic PLA2	Phospholipase A2
95	sp|B5U6Y4	PA2HS_ECHOC Phospholipase A2 homolog	Echis ocellatus	17	100	G.SVVELGKMIIQETGKSPFPSYTSYGCFCGGGEKGTPKDATDRCCFVHSCCYDKLPDCSPKTDRYKYQRENGEIICENSTSCKKR.I	9.74121e-18	PLA2	Phospholipase A2
96	sp|P0DMT2	PA2HS_ECHCS Phospholipase A2 homolog	Echis carinatus sochureki	98	122	R.KNLNTYNKKYTYYPNFWCKGDIEKC.	3.16692e-24	PLA2	Phospholipase A2
97	sp|Q9PRT7	PA2H4_BOTAS Phospholipase A2 homolog 4 (Fragment)	Gloydius blomhoffii	1	23	.SLVELGKMILQETGKNPVTYGAY.	6.7261e-05	PLA2	Phospholipase A2
98	tr|A0A0A1WC82	A0A0A1WC82_ECHCO Phospholipase A2 Group IIA c	Echis coloratus	74	99	S.PKTDQYKYKWENGEIICENSTSCKKR.I	0.00386	PLA2	Phospholipase A2
99	tr|A0A194APJ1	A0A194APJ1_9SAUR Phospholipase A2 2d	Agkistrodon piscivorus	1	137	.MRTLWIVALLLVGVEGSVLELGKMILQETGKNAITSYGSYGCNFGWGHRGQPKDATDRCCFVHKCCYKKLTDCNHKTDRYSYSWKNKAIICEEKNPCLKEMCECDKAVAICLRENLDTYNKKYKAYFKLKCKKPDTC.	0.0018	PLA2	Phospholipase A2
100	tr|U3FYP4	U3FYP4_MICFL Phospholipase A2 29	Micrurus fulvius	1	142	.MNPAHLLVLAAVCVSLLGASSIPPEPLNLYQFKNMIKCTNTRHWLSFTNYGCYCGYGGSGTPVDELDRCCQVHDKCYDTAKRVHKCFPSVRTYSYDCSEGKLTCKDNNTKCKDFVCNCDRTAAICFAKAPYNNKNFKIENSR.	0.00825	PLA2	Phospholipase A2
101	tr|I6L8L6	I6L8L6_9SAUR MTX-II chain A	Bothrops brazili	1	122	.SLVELGKMILQETGKNPAKSYGAYGCNCGVLGRGKPKDATDRCCYVHKCCYKKLTDCDPKKDRYSYSWKDKTIVCGENNSCLKELCECDKAVAICLRENLDTYNKKYRNNHLKPFCKKADPC.	0.0003	PLA2	Phospholipase A2
102	sp|F8J2D3	PLB_DRYCN Phospholipase-B 81	Drysdalia coronoides	248	261	Y.FAHSSWFTYAATLR.I	1.36881e-09	PLB	Phospholipase B
103	tr|A0A0A1WDU0	A0A0A1WDU0_ECHCO Phospholipase B-like	Echis coloratus	337	399	M.MADSGKTWAQIFEKENSGTYNNQYMILDTKKIKLQRSLEDGTLYIIEQIPKLVKYSDQTEVLR.H	1.77074e-29	PLB	Phospholipase B
104	tr|A0A1W7REM3	A0A1W7REM3_AGKCO Peptidyl-prolyl cis-trans isomerase	Agkistrodon contortrix contortrix	156	209	L.DGKHVVFGKVLEGMDVVRKMESTKTDSRDKPLKDVIIADCNVIEVEKPFAIAKE.	1.49925e-22	PPIases	Prolyl isomerase
105	tr|Q18DC8	Q18DC8_ECHOC Renin-like aspartic protease	Echis ocellatus	22	49	A.LQRISLKKMPSIRETLQEMGMKVADVLP.S	2.53132e-16	RLAP	Renin-like aspartic protease
106	tr|Q18DC9	Q18DC9_ECHOC Renin-like aspartic protease	Echis ocellatus	360	395	D.IPPPLGPLWLLGATFIKQYYIEFDRQNNRIGFATSF.	7.51941e-24	RLAP	Renin-like aspartic protease
107	sp|P81017	SLA_ECHCS Snaclec echicetin subunit alpha	Echis carinatus sochureki	113	133	R.KWIAVNCEFKFPFVCKAKIPR.	9.11981e-13	CTL	Snake C-type lectin/lectin-like
108	sp|Q6T7B6	SL2_BITGA Snaclec 2	Bitis gabonica	111	156	S.NVIYKNVAERFTKNCFGLEKETEYRTWLNILCGDDYPFVCKFPPRC.	5.66538e-13	CTL	Snake C-type lectin/lectin-like
109	sp|Q9PSM8	SL9B_ECHCA Snaclec coagulation factor IX/factor X-binding protein subunit B	Echis carinatus	1	43	.DCSSGWTAYGKHCYKVFDEPKTWEDAEKFCSEQANGGHLVSFR.S	3.1761e-05	CTL	Snake C-type lectin/lectin-like
110	tr|A0A0A1WDS6	A0A0A1WDS6_ECHCO C-type lectin C	Echis coloratus	24	148	A.AFCCPLGWSGYDENCYKAFEKQMNWADAERFCTQQHKGSHLVSLHNIAEADFVIKKTSPVLKGSVFWLGLNDVWNECNWGWTDGAQLDYKAWNVESNCFIYNTAKNHWLRTDCRSTHNFICKFRV.	1.64536e-05	CTL	Snake C-type lectin/lectin-like
111	tr|A0A0C5DKL1	A0A0C5DKL1_MACLB C-type lectin-like protein 3A	Macrovipera lebetina	110	158	T.DGSSVIYKNVIERFIKNCFGLEKQTNYRTWFNLSCGDDYPFVCKFPPRC.	2.64471e-12	CTL	Snake C-type lectin/lectin-like
112	tr|A0A0C5DM02	A0A0C5DM02_MACLB C-type lectin-like protein 3B	Macrovipera lebetina	24	148	A.AFCCPSGWSAYDQNCYKVFKEEMNWADAEKFCTEQHKGSHLVSLHNIAEADFVVKKTLAMLKDGVIWMGLNDVWNECNWGWTDGAKLDYKAWNEGTNCFVFKIAKNHWSRMDCSKTHNFVCKFRV.	0.00787	CTL	Snake C-type lectin/lectin-like
113	tr|A0A140DC06	A0A140DC06_BITAR C-type lectin 2	Bitis arietans	110	154	S.VIYQNMVERFRKNCFGLEKESGYRTWLNLCCGDDYPFVCKFPPRC.	2.0111e-06	CTL	Snake C-type lectin/lectin-like
114	tr|A0A194APT9	A0A194APT9_SISTE C-type lectin 7	Sistrurus tergeminus	22	59	T.AADCPSGWSFYEGHCYKFFQQEMTWADAEKFCTQQHTG.S	0.00588	CTL	Snake C-type lectin/lectin-like
115	tr|A0A1B3AXS3	A0A1B3AXS3_BITAR C-type lectin-like protein	Bitis arietans	106	154	T.DGSSVIYQIMVERFRKNCFGLEKESGYRTWLNLRCGDDYPFVCKFPPRC.	3.71588e-05	CTL	Snake C-type lectin/lectin-like
116	tr|K9JBV0	K9JBV0_DABSI p68 alpha subunit	Daboia siamensis	19	158	L.SGTRADFDCPSGWSAHDQHCYKAFDEPKRSGDAETFCTEQANSGHLVSIESVEEAEFVAQLISENIKTPADYVWIGLRNQRKAQYCISKWTDGSSVIYKNVIERFIKNCFGLEKESDYRTWFNLSCGDDYPFVCKFPPRC.	0.00218	CTL	Snake C-type lectin/lectin-like
117	sp|P28891	VM1F_AGKCO Snake venom metalloproteinase fibrolase	Agkistrodon contortrix contortrix	98	203	Q.LLTAIDFDGDTVGLAYVGGMCQLKHSTGVIQDHSAINLLVALTMAHELGHNLGMNHDGNQCHCGANSCVMAAMLSDQPSKLFSDCSKKDYQTFLTVNNPQCILNKP.	2.89337e-08	P-I SVMP	Snake venom metallopeptidase
118	sp|E9NW27	VM2P2_PROMU Zinc metalloproteinase/disintegrin PMMP-2	Protobothrops mucrosquamatus	51	75	K.YEDAMQYEFKVNGEAVVLHLEKNKG.L	2.8656e-06	P-II SVMP	Snake venom metallopeptidase
119	tr|E9JGA9	E9JGA9_ECHCO Metalloproteinase (Fragment)	Echis coloratus	1	33	.TRSVGVIEDYSPIVRAVAVTMAHEMGHNLGMYH.D	7.09925e-12	P-II SVMP	Snake venom metallopeptidase
120	tr|E9JGE9	E9JGE9_ECHCO Metalloproteinase	Echis coloratus	205	220	E.LVIVADHAMVTKNKGD.L	0.00023	P-II SVMP	Snake venom metallopeptidase
121	tr|E9JGG7	E9JGG7_ECHCS Metalloproteinase (Fragment)	Echis carinatus sochureki	38	64	R.ERDLLNRRPHDHAQFLTNINFDDDVIG.I	1.21867e-13	P-II SVMP	Snake venom metallopeptidase
122	tr|E9JGG8	E9JGG8_ECHCS Metalloproteinase (Fragment)	Echis carinatus sochureki	27	72	D.PRYIELIIVADHAMVTKKKGDLTVLTTWVHQVVNDMIVMYEDLNIY.I	6.25579e-12	P-II SVMP	Snake venom metallopeptidase
123	tr|E9JGH0	E9JGH0_ECHCS Metalloproteinase	Echis carinatus sochureki	274	303	R.DLLNRRPHDNAQFLTNINFDDNVIGRAYER.G	2.21155e-34	P-II SVMP	Snake venom metallopeptidase
124	tr|E9JGH1	E9JGH1_ECHCS Metalloproteinase	Echis carinatus sochureki	272	305	R.ERDLLNRRPHDNAQFLTNINFDDNVIGRAYERSM.C	1.00757e-21	P-II SVMP	Snake venom metallopeptidase
125	tr|E9JGH2	E9JGH2_ECHCS Metalloproteinase	Echis carinatus sochureki	272	302	R.KRSLLKEIKHDNAQLLTNINFKDNVIGRAYK.K	5.42318e-20	P-II SVMP	Snake venom metallopeptidase
126	tr|E9JGH3	E9JGH3_ECHCS Metalloproteinase	Echis carinatus sochureki	189	271	E.QQRFDPKHIELVIVTDHTMYEKIHSEKYALVRRVNEMVNDVIVIYKDLNIYITLAAIVMWKKRDKITVTSSADDTLKSFGEWR.K	1.45424e-25	P-II SVMP	Snake venom metallopeptidase
127	tr|E9JGH4	E9JGH4_ECHCS Metalloproteinase (Fragment)	Echis carinatus sochureki	38	111	R.ERDLLNRRPHDNAQFLTNINFDDNVIGRAYERSMCDPKTSVGIVKDHSTVHLYVASTMAHEMGHNLGMDHDGSQ.C	2.84937e-26	P-II SVMP	Snake venom metallopeptidase
128	sp|P0DJE2	VM3A_VIPAA Zinc metalloproteinase-disintegrin-like ammodytagin (Fragments)	Vipera ammodytes ammodytes	154	167	D.PDYGMVDLGTKCAD.G	1.0297e-07	P-III SVMP	Snake venom metallopeptidase
129	sp|P85005	VM3PN_PROSR Zinc metalloproteinase-disintegrin-like proatherocytin (Fragments)	Proatheris superciliaris	1	15	.GNYYGYCRVHLNTAY.	0.00118	P-III SVMP	Snake venom metallopeptidase
130	sp|Q6X1T6	VM3E6_ECHOC Zinc metalloproteinase-disintegrin-like EoMP06 (Fragment)	Echis ocellatus	493	515	E.PGTKCEDGKVCINRKCVDVNTAY.	1.53542e-09	P-III SVMP	Snake venom metallopeptidase
131	sp|Q90495	VM3E_ECHCA Zinc metalloproteinase-disintegrin-like ecarin	Echis carinatus	594	616	E.PGTKCEDGKVCINRKCVDVNTAY.	0.000686	P-III SVMP	Snake venom metallopeptidase
132	tr|A0A077L6T2	A0A077L6T2_PROFL Metalloprotease P-III 3 (Fragment)	Protobothrops flavoviridis	91	117	G.NYYGYCRKEQNTKIACEPQNVKCGRLY.	0.000289	P-III SVMP	Snake venom metallopeptidase
133	tr|A0A077LA57	A0A077LA57_PROEL Metalloprotease P-IIIc (Fragment)	Protobothrops elegans	155	171	L.VAIAMAHEMGHNLGMDH.	1.54715e-09	P-III SVMP	Snake venom metallopeptidase
134	tr|A0A0A1WCB1	A0A0A1WCB1_ECHCO Snake venom metalloproteinase R (Fragment)	Echis coloratus	122	138	D.GKVCNSNRHCVDVNTAY.	6.23451e-10	P-III SVMP	Snake venom metallopeptidase
135	tr|A0A0A1WD12	A0A0A1WD12_ECHCO Snake venom metalloproteinase F (Fragment)	Echis coloratus	23	37	D.LLSRKTHDNAQLFTA.I	1.58588e-07	P-III SVMP	Snake venom metallopeptidase
136	tr|A0A0A1WDV1	A0A0A1WDV1_ECHCO Snake venom metalloproteinase N (Fragment)	Echis coloratus	144	166	D.PGTKCEDGKVCINGKCVDVNTAY.	1.90657e-07	P-III SVMP	Snake venom metallopeptidase
137	tr|A0A1L8D656	A0A1L8D656_BOTAT BATXSVMPIII17	Bothrops atrox	330	347	L.VASTMAHEMGHNLGMDDD.N	1.98463e-10	P-III SVMP	Snake venom metallopeptidase
138	tr|A0A1L8D677	A0A1L8D677_BOTAT BATXSVMPIII20	Bothrops atrox	330	382	L.VASTMAHEMGHNLGMYHDNDTCTCNASSCIMAAAISNDTSKLFSNCSQEYQQK.Y	5.58006e-05	P-III SVMP	Snake venom metallopeptidase
139	tr|A0A1L8D691	A0A1L8D691_BOTAT BATXSVMPIII14	Bothrops atrox	577	606	D.PDYGMVDNGTKCEEGKVCSNRKCVDVTTAY.	0.000107	P-III SVMP	Snake venom metallopeptidase
140	tr|E9JG26	E9JG26_ECHCS Metalloproteinase	Echis carinatus sochureki	280	297	R.ASDLLSHKTHDNAQLLTA.I	3.9703e-08	P-III SVMP	Snake venom metallopeptidase
141	tr|E9JG27	E9JG27_ECHCS Metalloproteinase (Fragment)	Echis carinatus sochureki	255	303	D.GPTAGLGYVGSMCEPQYSAAIVQDHNKINILVAMAMAHELGHNLGMNHD.E	9.0819e-24	P-III SVMP	Snake venom metallopeptidase
142	tr|E9JG28	E9JG28_ECHCS Metalloproteinase	Echis carinatus sochureki	569	611	R.KKNPCKMHYLDADQHKGMVEPGTKCEDGKVCINRKCVDINTAY.	4.84863e-15	P-III SVMP	Snake venom metallopeptidase
143	tr|E9JG29	E9JG29_ECHCS Metalloproteinase	Echis carinatus sochureki	280	349	R.ASGLLSHKTHDNAQLLTAIDISGSVIGKAHISSMCQATRSVGVVEDHSPIVREVAVTMAHEMGHNLGMYH.D	4.99107e-39	P-III SVMP	Snake venom metallopeptidase
144	tr|E9JG30	E9JG30_ECHCS Metalloproteinase	Echis carinatus sochureki	278	322	R.VSDLLNRKKHDYVQLLTNITLD(FKSLGMAFVDGMCKPYRSVGLIK)[26.70272].D	1.6845e-08	P-III SVMP	Snake venom metallopeptidase
145	tr|E9JG33	E9JG33_ECHCS Metalloproteinase	Echis carinatus sochureki	278	385	R.EKNLMKRKEHDNAQLVTGINFNGQTLGRAPVSGMCSPRRSVGVIQDYCKTHLLTAVVMAHELGHNLGMNHDKSHCKCPVKSCIMSPTARPEPVFSFSDCSWNDYRSFR.D	1.94396e-38	P-III SVMP	Snake venom metallopeptidase
146	tr|E9JG34	E9JG34_ECHCS Metalloproteinase	Echis carinatus sochureki	240	253	E.MYLPWNIRVPLVGL.E	5.01103e-06	P-III SVMP	Snake venom metallopeptidase
147	tr|E9JG35	E9JG35_ECHCS Metalloproteinase	Echis carinatus sochureki	193	216	T.PEQQRYLNSEKHIKVAIIADYLIY.R	2.792e-06	P-III SVMP	Snake venom metallopeptidase
148	tr|E9JG36	E9JG36_ECHCS Metalloproteinase (Fragment)	Echis carinatus sochureki	217	324	R.EKNLMKRKEHDNAQLVTGINFNGQTLGRAPVSGMCSPRRSVGVIQDYCKTHLLTAVVMAHELGHNLGMNHDKSHCKCPVKSCIMSPTARPEPVFSFSDCSWNDYRSFR.D	8.05252e-29	P-III SVMP	Snake venom metallopeptidase
149	tr|E9JG39	E9JG39_ECHCS Metalloproteinase	Echis carinatus sochureki	283	297	D.LLNRKEHDYAQLLTA.I	6.82637e-09	P-III SVMP	Snake venom metallopeptidase
150	tr|E9JG42	E9JG42_ECHCS Metalloproteinase (Fragment)	Echis carinatus sochureki	11	57	D.TKSCTCGANPCIMFSEVSEPTPKEFSRCSYDQYRDYLPKYNPKCIFD.P	2.12984e-09	P-III SVMP	Snake venom metallopeptidase
151	tr|E9JG44	E9JG44_ECHCS Metalloproteinase (Fragment)	Echis carinatus sochureki	45	58	T.SSAENTLNSFGDWR.A	3.64129e-06	P-III SVMP	Snake venom metallopeptidase
152	tr|E9JG48	E9JG48_ECHCS Metalloproteinase (Fragment)	Echis carinatus sochureki	82	189	R.EKNLMKRKEHDNAQLVTGINFNGQTLGRAPVSGMCSPRRSVGVIQDYCKTHLLTAVVMAHELGHNLGMNHDKSHCKCPVKSCIMSPTARPEPVFSFSDCSWNDYRSFR.D	2.69028e-20	P-III SVMP	Snake venom metallopeptidase
153	tr|E9JG52	E9JG52_ECHCS Metalloproteinase	Echis carinatus sochureki	191	277	V.ATSEQQRSYQKYIELALIADNLIYRKYTGNSTAIKTRMYEIINTLNLVYIVFSIHIALTHIEIWSETDQIKVQSAADDTLHLFGDWR.E	2.04464e-22	P-III SVMP	Snake venom metallopeptidase
154	tr|E9JG56	E9JG56_ECHCO Metalloproteinase	Echis coloratus	319	349	R.SVGVIEDYSPIVRAVAVTMAHEMGHNLGMYH.D	4.4105e-14	P-III SVMP	Snake venom metallopeptidase
155	tr|E9JG75	E9JG75_ECHCO Metalloproteinase	Echis coloratus	326	369	D.YSPIVRAVAVTMAHEMGHNLGMYHDGNQCNCGANSCIMYPYISD.P	1.57348e-14	P-III SVMP	Snake venom metallopeptidase
156	tr|E9JG99	E9JG99_ECHCO Metalloproteinase	Echis coloratus	186	283	E.VSQLVATSEAAAAAAAAAAAAAAAAAAAAAAAAAITKYNADLTAIRTRVYEMLNTANEIYIYMHIRVALVGIAFWSNGDLITVTSSAEDTLNSFGNWR.A	0.000181	P-III SVMP	Snake venom metallopeptidase
157	tr|E9JGB7	E9JGB7_ECHPL Metalloproteinase	Echis pyramidum leakeyi	585	617	S.RNPDYGMVDIGTKCADGKVCNSNRHCVDVNTAY.	3.25696e-06	P-III SVMP	Snake venom metallopeptidase
158	tr|E9JGB8	E9JGB8_ECHPL Metalloproteinase (Fragment)	Echis pyramidum leakeyi	5	14	D.DTLHSFGEWR.A	7.93244e-05	P-III SVMP	Snake venom metallopeptidase
159	tr|E9KJZ3	E9KJZ3_ECHOC Group III snake venom metalloproteinase (Fragment)	Echis ocellatus	49	101	Y.IMAHEMGHSLGMLHDTKSCTCGDKPCIMFSKESVPPPKEFSSCSYDQYNKYLL.K	3.5347e-05	P-III SVMP	Snake venom metallopeptidase
160	tr|E9KJZ4	E9KJZ4_ECHOC Group III snake venom metalloproteinase (Fragment)	Echis ocellatus	1	52	.AYIMAHEMGHSLGMLHDTKSCTCGDKPCIMFSKESVPPPKEFSSCSYDQYNK.Y	1.30967e-13	P-III SVMP	Snake venom metallopeptidase
161	tr|E9KNB4	E9KNB4_ECHCS Group III snake venom metalloproteinase	Echis carinatus sochureki	277	331	R.QRNLLNRKTHDNAHLLTGIDFDGSTVGLAYIGTMCQSKYSTAVVQDLSPTNLLAA.I	1.2245e-10	P-III SVMP	Snake venom metallopeptidase
162	tr|F8S110	F8S110_CROAD Metalloproteinase 9 (Fragment)	Crotalus adamanteus	1	41	.MCNQKDSAGVIQDHSAINLLVAATMAHEMGHNLGMDHDGNQ.C	0.000235	P-III SVMP	Snake venom metallopeptidase
163	tr|Q2UXQ0	Q2UXQ0_ECHOC Group III snake venom metalloproteinase	Echis ocellatus	571	613	R.KKNPCKMHYLNADQHKGMVEPGTKCEDGKVCINRKCVDVKTAY.Y	3.05884e-06	P-III SVMP	Snake venom metallopeptidase
164	sp|A8YPR6	SVMI_ECHOC Snake venom metalloprotease inhibitor 02D01	Echis ocellatus	239	279	D.GKQASQKWGRLVDHDHDHHHHHHPGSSVGGGGGGGGGGARR.L	3.45583e-11	SVMPi	Snake venom metalloprotease inhibitors
165	sp|P0C7K4	SVMI1_ATHSQ Poly-His-poly-Gly peptide 1	Atheris squamigera	1	9	.EDDHHHHHH.H	3.06097e-05	pHpG	Snake venom metalloprotease inhibitors/bradykinin-potentiating-C-type natriuretic peptides
166	sp|P0C7K6	SVMI2_ATHNI Poly-His-poly-Gly peptide 2	Atheris nitschei	1	30	.EDDHDHHHHHHHHHHHHGVGGGGGGGGGGA.	7.49466e-13	pHpG	Snake venom metalloprotease inhibitors/bradykinin-potentiating-C-type natriuretic peptides
167	sp|P0DL07	SVMI_BOTCO Poly-His-poly-Gly peptide 1	Bothrops cotiara	1	18	.HHDHHAAVGGGGGGGGGA.	4.9807e-09	pHpG	Snake venom metalloprotease inhibitors/bradykinin-potentiating-C-type natriuretic peptides
168	tr|E9JG14	E9JG14_ECHCS Serine protease (Fragment)	Echis carinatus sochureki	25	51	L.VTGGDECNINEHPFLVALHTARSKRFH.C	1.39121e-05	SVSPs	Snake venom serine proteinase
169	tr|E9JG22	E9JG22_ECHCS Serine protease (Fragment)	Echis carinatus sochureki	175	191	R.AYKRNLANSKILCAGIR.K	8.8652e-06	SVSPs	Snake venom serine proteinase
170	sp|P84746	VVP1_BOTJR 1370.6 Da venom vasodilator peptide	Bothrops jararacussu	1	12	.PKVSPRWPPIPP.	4.5195e-05	VVP	Venom vasodilator peptide

## Sheet: S-9
Table S9. List of protein identified from Echis carinatus sockureki (IRAN) venom [Hormozgan population (HO)] using the SEC-RPLC-MS/MS top-down proteomics technique. The six isolated fractions of Ecs_HO venom were directly subjected to RPLC-MS/MS analyses in reduced and non-reduced forms. Protein identification of top-down MS/MS data were accomplished by TopPIC suite software package (version 1.1.…
Hormozgan population
	Accession	Description	Organism	first residue	last residue	proteoform	E-value	Protein classes
1	sp|A7ISW1	QPCT_BOIIR Glutaminyl-peptide cyclotransferase	Boiga irregularis	191	206	Y.TTKETPVLSNPGPYLE.F	0.0243	5'NTD	5'-nucleotidase
2	sp|A8YPR6	SVMI_ECHOC Snake venom metalloprotease inhibitor 02D01	Echis ocellatus	279	298	R.GDNMHDYCNGKTCDCPRNPH.K	5.12462e-10	5'NTD	5'-nucleotidase
3	sp|B0VXW0	OXLA_SISCA L-amino-acid oxidase	Sistrurus catenatus edwardsii	520	531	Y.IKRMEKVFPAVE.G	1.56401e-11	5'NTD	5'-nucleotidase
4	sp|B5AR80	OXLA_BOTPA L-amino-acid oxidase (Fragment)	Bothrops pauloensis	431	447	G.IKVVYDLSQKPGKRVVS.L	2.5101e-06	5'NTD	5'-nucleotidase
5	sp|B5U6Y4	PA2HS_ECHOC Phospholipase A2 homolog	Echis ocellatus	34	59	E.LQIHANKLTTLGVNKIIALGHSGFFE.D	4.75839e-07	5'NTD	5'-nucleotidase
6	sp|B5U6Y8	OXLA_ECHOC L-amino-acid oxidase	Echis ocellatus	121	157	K.EGESKMCQGLTKWTNFHDWNNINCEDLYPFVCKFSAV.	8.93062e-16	Acidic PLA2	Phospholipase A2
7	sp|B6EWW8	V5NTD_GLOBR Snake venom 5'-nucleotidase	Gloydius brevicaudus	290	321	Y.FGIAYPLPKQDLAAIPDFQSGAMENWGLTTYR.E	3.07923e-10	AP	Aminopeptidase
8	sp|B7FDI0	CRVP_VIPNI Cysteine-rich venom protein (Fragment)	Vipera nikolskii	41	51	T.DRCCIVHDCCY.G	0.00217	Basic PLA2	Phospholipase A2
9	sp|C0HJE7	OXLA_CRODU L-amino acid oxidase (Fragment)	Crotalus durissus terrificus	1	54	.NLIQFSNMIQCANKGSRPSLDYADYGCYCGWGGSGTPVDELDRCCKVHDDCYAE.A	7.32539e-07	Basic PLA2	Phospholipase A2
10	sp|E5L0E3	VSPAF_DABSI Alpha-fibrinogenase-like	Daboia siamensis	1	54	.NLIQFKSIIECANRGSRRWLDYADYGCYCGWGGSGTPVDELDRCCKVHDECYGE.A	6.92448e-06	Basic PLA2	Phospholipase A2
11	sp|G8XQX1	OXLA_DABRR L-amino-acid oxidase	Daboia russelii	1	122	.SVVELGKMIIQETGKSPFPSYTSYGCFCGGGERGPPLDATDRCCLAHSCCYDTLPDCSPKTDRYKYKRENGEIICENSTSCKKRICECDKAVAVCLRKNLNTYNKKYTYYPNFWCKGDIEKC.	2.28087e-33	Basic PLA2	Phospholipase A2
12	sp|J3SBP3	PDE2_CROAD Venom phosphodiesterase 2	Crotalus adamanteus	2	27	G.NVDFDSESPRKPEIQNEIIDLHNSLR.R	0.00073	CRISP	Cysteine-rich secretory protein
13	sp|K9N7B7	OXLA_CRODM L-amino acid oxidase Cdc18 (Fragment)	Crotalus durissus cumanensis	1	26	.NVDFDSESPRKPEIQNEIIDLHNSLR.R	3.13949e-12	CRISP	Cysteine-rich secretory protein
14	sp|P0C2D6	OXLA_PROMU L-amino-acid oxidase (Fragment)	Protobothrops mucrosquamatus	20	45	G.NVDFDSESPRKPEIQNEIIDLHNSLR.R	1.27982e-11	CRISP	Cysteine-rich secretory protein
15	sp|P0C2D7	OXLA_VIPBB L-amino-acid oxidase (Fragments)	Vipera berus berus	113	133	R.KWIAVNCEFKFPFVCKAKIPR.	1.21787e-14	CTL	Snake C-type lectin/lectin-like
16	sp|P0C6A3	DIDBA_ECHML Disintegrin EMS11A	Echis multisquamatus	24	42	I.RKFGLKLNEFVQETENGWY.F	0.00538	CTL	Snake C-type lectin/lectin-like
17	sp|P0C6R5	VM2MU_ECHML Disintegrin multisquamatin	Echis multisquamatus	317	340	A.TRRIKFEPPLPPKKAHALRSVHYR.S	8.72035e-14	CTL	Snake C-type lectin/lectin-like
18	sp|P0C7K4	SVMI1_ATHSQ Poly-His-poly-Gly peptide 1	Atheris squamigera	494	513	P.GTKCEDGKVCINRKCVDVNT.A	2.54722e-11	CTL	Snake C-type lectin/lectin-like
19	sp|P0C7K6	SVMI2_ATHNI Poly-His-poly-Gly peptide 2	Atheris nitschei	45	60	G.LKKTSNPKDIVVVGAG.M	0.000106	CTL	Snake C-type lectin/lectin-like
20	sp|P0CAS3	PA2BC_CRODR Basic phospholipase A2 Cdr-12	Crotalus durissus ruruima	16	68	R.EGEHCISGPCCRNCKFLNAGTICKKAMLDGLNDYCTGISSDCPRNRYKGKEDD.	5.57319e-16	DIS	Disintegrin
21	sp|P0CV92	QPCT_CROAT Glutaminyl-peptide cyclotransferase (Fragments)	Crotalus atrox	1	47	.EGEECESGPCCRNCKFLKEGTICKRARGDDMDDYCNGKTCDCPRNPH.K	8.29137e-26	DIS	Disintegrin
22	sp|P0DI84	OXLA_VIPAA L-amino-acid oxidase	Vipera ammodytes ammodytes	1	49	.QCESGPCCRNCKFLKEGTICKRARGDDMDDYCNGKTCDCPRNPHKGPAT.	2.52121e-28	DIS	Disintegrin
23	sp|P0DJJ6	VM1B_BOTLC Snake venom metalloproteinase BleucMP (Fragment)	Bothrops leucurus	48	62	M.NSVHPCCDPVTCEPR.E	1.7442e-07	DIS	Disintegrin
24	sp|P0DMT2	PA2HS_ECHCS Phospholipase A2 homolog	Echis carinatus sochureki	205	223	F.DGEEAFVRWSPSDSLYGSR.S	2.70397e-11	GpCT	Glutaminyl-peptide cyclotransferase
25	sp|P0DMT4	CRVP_ECHCO Cysteine-rich venom protein	Echis coloratus	45	57	A.RHPVEDDHIPFLR.G	1.16854e-08	GpCT	Glutaminyl-peptide cyclotransferase
26	sp|P17347	VM2EA_ECHCS Disintegrin echistatin-alpha	Echis carinatus sochureki	300	316	D.HSTLGITFVYGMCKSDR.S	6.07342e-10	GpCT	Glutaminyl-peptide cyclotransferase
27	sp|P20252	PA2B_PSEAU Basic phospholipase A2 PA-5	Pseudechis australis	161	171	A.HEMGHNLGMDH.	0.000436	GpCT	Glutaminyl-peptide cyclotransferase
28	sp|P20253	PA2B9_PSEAU Basic phospholipase A2 PA-9C	Pseudechis australis	319	339	R.RGVPILHLIPSPFPRVWHVME.D	1.28398e-05	GpCT	Glutaminyl-peptide cyclotransferase
29	sp|A0A024BTN9	OXLA_BOTSC L-amino acid oxidase Bs29 (Fragment)	Bothriechis schlegelii	204	216	D.MIGDLLNEDSGYY.V	4.8087e-11	LAOs	L-amino acid oxidase
30	sp|P48650	PA2HS_ECHCA Basic phospholipase A2 homolog ecarpholin S	Echis carinatus	247	264	E.KRFDEIVGGMDQLPTSMY.E	9.5628e-13	LAOs	L-amino acid oxidase
31	sp|P79845	CRVP_PROMU Cysteine-rich venom protein	Protobothrops mucrosquamatus	233	253	Y.VSFIESLKHDDIFAYEKRFDE.I	9.97357e-13	LAOs	L-amino acid oxidase
32	sp|P81017	SLA_ECHCS Snaclec echicetin subunit alpha	Echis carinatus sochureki	43	68	K.NGLKKTSNPKDIVVVGAGMSGLSAAY.V	6.45868e-14	LAOs	L-amino acid oxidase
33	sp|P81375	OXLA_MACLB L-amino-acid oxidase (Fragments)	Macrovipera lebetina	1	12	.AHDRNPLEECFR.E	0.0562	LAOs	L-amino acid oxidase
34	sp|P82465	DID6A_ECHCS Disintegrin EC6 subunit alpha	Echis carinatus sochureki	455	504	Y.QFQHFSEALTAPVGRIFFAGEYTANAHGWIDSTIKSGLTAARDVNRASEL.	7.41156e-28	LAOs	L-amino acid oxidase
35	sp|Q4F867	OXLA_DABSI L-amino-acid oxidase (Fragments)	Daboia siamensis	230	248	Y.EKRFDEIVGGMDQLPTSMY.E	4.1158e-06	LAOs	L-amino acid oxidase
36	sp|Q4PRD0	SL3_DABSI Snaclec 3	Daboia siamensis	1	12	.ADNKNPLEECFR.E	5.21057e-06	LAOs	L-amino acid oxidase
37	sp|Q6STF1	OXLA_GLOHA L-amino-acid oxidase	Gloydius halys	72	88	F.AGEYTANAHGWIDSTIK.	4.85054e-13	LAOs	L-amino acid oxidase
38	sp|Q6T7B6	SL2_BITGA Snaclec 2	Bitis gabonica	1	65	.DRNPLEECFRETDYEEFLEIARNGLKKTSNPKHV)[62.02263]VVVGAGMSGLSAAYVLAGAGHKVTVLEASER.A	1.7176e-17	LAOs	L-amino acid oxidase
39	sp|Q6X1T6	VM3E6_ECHOC Zinc metalloproteinase-disintegrin-like EoMP06 (Fragment)	Echis ocellatus	90	107	Q.KPYQFQHFSEALTAPVGR.	0.000264	LAOs	L-amino acid oxidase
40	sp|Q7T2Q1	SLA_ECHML Snaclec EMS16 subunit alpha	Echis multisquamatus	1	12	.PKVSPRWPPIPP.	1.26344e-14	LAOs	L-amino acid oxidase
41	sp|Q7T3S7	PA2A1_ECHCA Acidic phospholipase A2 EC-I	Echis carinatus	24	148	A.AFCCPSGWSAYDQNCYKVFTEEMNWADAEKFCTEQHKGSHLLSLHNIAEADFVLKKTLAMLKDGVIWMGLNDVWNECNWGWTDGAKLDYKAWNEGTNCFVFKIAKNHWSHMDCSSTHNFVCKFRV.	1.27557e-18	LAOs	L-amino acid oxidase
42	sp|Q90495	VM3E_ECHCA Zinc metalloproteinase-disintegrin-like ecarin	Echis carinatus	302	318	R.SNLRRHPVEDDHIPFLR.R	4.03157e-06	LAOs	L-amino acid oxidase
43	sp|Q90YA8	QPCT_GLOBL Glutaminyl-peptide cyclotransferase	Gloydius blomhoffii	353	364	N.LSKILQVFVLEY.L	3.41684e-27	LAOs	L-amino acid oxidase
44	tr|A0A077L6L4	A0A077L6L4_PROEL Amine oxidase	Protobothrops elegans	34	85	D.YEEFLEIARNGLKKTSNPKDIVVVGAGMSGLSAAYVLAGAGHKVTVLEASER.V	0.000991	LAOs	L-amino acid oxidase
45	tr|A0A077L7W4	A0A077L7W4_PROEL Metalloprotease P-IIIa (Fragment)	Protobothrops elegans	19	30	C.ADSRNPLEECFR.E	0.00279	LAOs	L-amino acid oxidase
46	tr|A0A077LA57	A0A077LA57_PROEL Metalloprotease P-IIIc (Fragment)	Protobothrops elegans	323	337	I.KFEPPLPPKKAHALR.S	0.000186	LAOs	L-amino acid oxidase
47	tr|A0A098LZZ5	A0A098LZZ5_9SAUR Glutaminyl-peptide cyclotransferase	Hypsiglena sp.	148	172	R.VGEVNKDPGLLKYPVKPSEEGKSAG.Q	0.0294	LAOs	L-amino acid oxidase
48	tr|A0A0A1WCB1	A0A0A1WCB1_ECHCO Snake venom metalloproteinase R (Fragment)	Echis coloratus	796	810	T.LQLKTFLPIFVNPVN.	2.10748e-05	PDE	Phosphodiesterase
49	tr|A0A0A1WCY6	A0A0A1WCY6_ECHCO Amine oxidase	Echis coloratus	4	24	D.HHHHHHHHHGVGGGGGGGGGG.	2.54954e-05	pHpG	Snake venom metalloprotease inhibitors/bradykinin-potentiating-C-type natriuretic peptides
50	tr|A0A0A1WD12	A0A0A1WD12_ECHCO Snake venom metalloproteinase F (Fragment)	Echis coloratus	1	13	.EDDHDHHHHHHHH.H	5.84875e-10	pHpG	Snake venom metalloprotease inhibitors/bradykinin-potentiating-C-type natriuretic peptides
51	tr|A0A0A1WDQ6	A0A0A1WDQ6_ECHCO Snake venom metalloproteinase G (Fragment)	Echis coloratus	24	148	A.AFCCPLGWSGYDENCYKAFEKQMNWADAERFCTQQHKGSHLVSLHNIAEADFVIKKTSPVLKGSVFWLGLNDVWNECNWGWTDGAQLDYKAWNVESNCFIYNTAKNHWLRTDCRSTHNFICKFRV.	5.23648e-06	P-II SVMP	Snake venom metallopeptidase
52	tr|A0A0A1WDS6	A0A0A1WDS6_ECHCO C-type lectin C	Echis coloratus	336	350	A.HEMGHNLGMTHDENY.C	0.0329	P-II SVMP	Snake venom metallopeptidase
53	tr|A0A0A1WDU0	A0A0A1WDU0_ECHCO Phospholipase B-like	Echis coloratus	195	205	E.KKHFDPRYIEL.V	0.0132	P-II SVMP	Snake venom metallopeptidase
54	tr|A0A0A1WDV5	A0A0A1WDV5_ECHCO Snake venom metalloproteinase I (Fragment)	Echis coloratus	243	259	D.FNSLGMAFIDGMCKPYR.S	2.79289e-10	P-II SVMP	Snake venom metallopeptidase
55	tr|A0A0B8RXZ9	A0A0B8RXZ9_BOIIR Snake venom 5'-nucleotidase	Boiga irregularis	210	220	A.DHAMVTKNKGD.L	1.75143e-05	P-II SVMP	Snake venom metallopeptidase
56	tr|A0A0F7ZB46	A0A0F7ZB46_CROAD Aminopeptidase	Crotalus adamanteus	89	139	H.LSVAVAMAHEMGHNLGMDHDGNQCNCGGAGCVMSEELIESRSYKFSDCSKN.Q	9.73491e-19	P-II SVMP	Snake venom metallopeptidase
57	tr|A0A0H3U1Z9	A0A0H3U1Z9_PROMB Phospholipase A2	Protobothrops mangshanensis	27	68	D.PRYIELIIVADHAMVTKKKGDLTVLTTWVHQVVNDMIVMYED.L	4.51312e-23	P-II SVMP	Snake venom metallopeptidase
58	tr|A0A0K8RZ12	A0A0K8RZ12_CROHD Metalloproteinase (Type II) 1	Crotalus horridus	291	303	I.NFDDNVIGRAYER.G	4.80834e-09	P-II SVMP	Snake venom metallopeptidase
59	tr|A0A140YIG3	A0A140YIG3_ECHCA Basic phospholipase A2	Echis carinatus	408	441	L.QNSANPCCDPETCQPKRGKHCISGPCCRNCYFLR.A	1.36178e-21	P-II SVMP	Snake venom metallopeptidase
60	tr|A0A194APV2	A0A194APV2_9SAUR L-amino acid oxidase	Agkistrodon piscivorus	91	124	Y.VASTMAHEMGHNLGMDHDGSQCNCGGAGCVMSAT.I	2.68374e-19	P-II SVMP	Snake venom metallopeptidase
61	tr|A0A194ARU8	A0A194ARU8_SISTE L-amino acid oxidase 1c	Sistrurus tergeminus	431	475	G.ADCASGPCCRDCKFLKEGTICKRARGDNMDDYCNGKTCDCPRNPH.K	1.88993e-05	P-II SVMP	Snake venom metallopeptidase
62	tr|A0A1I9KNS3	A0A1I9KNS3_VIPAA Metalloproteinase of class P-II MPII-3	Vipera ammodytes ammodytes	142	156	L.CGDDYPFVCKFPPRC.	7.97366e-07	P-III SVMP	Snake venom metallopeptidase
63	tr|A0A1L8D667	A0A1L8D667_BOTAT BATXNUC1	Bothrops atrox	36	69	L.SYGSYGCYCGWGGQGPPKDATDRCCLVHDCCYTR.V	7.53284e-09	P-III SVMP	Snake venom metallopeptidase
64	tr|A0A1W7RB89	A0A1W7RB89_CROAD Cadam10_SVMPIII-5	Crotalus adamanteus	317	335	A.ARRINFRPPLPPKKAHALR.S	0.00332	P-III SVMP	Snake venom metallopeptidase
65	tr|A0A2I4HXH5	A0A2I4HXH5_NAJAT Venom 5'-nucleotidase	Naja atra	153	161	A.HEMGHNLG0.02017M.E	0.00107	P-III SVMP	Snake venom metallopeptidase
66	tr|E9JG00	E9JG00_ECHCO Serine protease (Fragment)	Echis coloratus	42	53	R.EKLMAVTEYIPP.K	0.000501	P-III SVMP	Snake venom metallopeptidase
67	tr|E9JG05	E9JG05_ECHOC Serine protease (Fragment)	Echis ocellatus	108	138	D.PDYGMVDIGTKCADGKVCNSNRHCVDVNTAY.	8.58688e-08	P-III SVMP	Snake venom metallopeptidase
68	tr|E9JG26	E9JG26_ECHCS Metalloproteinase	Echis carinatus sochureki	23	35	D.LLSRKTHDNAQLF.T	0.000105	P-III SVMP	Snake venom metallopeptidase
69	tr|E9JG27	E9JG27_ECHCS Metalloproteinase (Fragment)	Echis carinatus sochureki	266	275	Y.DTLNSFGEWR.E	7.02591e-06	P-III SVMP	Snake venom metallopeptidase
70	tr|E9JG28	E9JG28_ECHCS Metalloproteinase	Echis carinatus sochureki	318	332	T.LSVGVVQDHSPTVRD.V	1.45008e-05	P-III SVMP	Snake venom metallopeptidase
71	tr|E9JG29	E9JG29_ECHCS Metalloproteinase	Echis carinatus sochureki	413	568	R.RAGTECRPAKDECDMADLCNGQSDECPKDQFQRNGHPCQNNNGYCYNGKCPVMGNQCISLFGSRATVAEDACFQFNRLGSDYGYCRKENGIKIPCAPEDVKCGRLYCFDNLPEHKNPCQIYYTLRDENKGMVEPGTKCENGKVCINGKCVDVNTAY.	4.43231e-17	P-III SVMP	Snake venom metallopeptidase
72	tr|E9JG30	E9JG30_ECHCS Metalloproteinase	Echis carinatus sochureki	397	455	L.RKDIASPAVCGNEIWEEGEECDCGSPEDCQNPCCEAETCELYPGAVCEDGLCCDKCKFR.T	1.03017e-20	P-III SVMP	Snake venom metallopeptidase
73	tr|E9JG33	E9JG33_ECHCS Metalloproteinase	Echis carinatus sochureki	280	349	R.ASGLLSHKTHDNAQLLTAIDISGSVIGKAHISSMCQATRSVGVVEDHSPIVREVAVTMAHEMGHNLGMYH.D	3.91236e-17	P-III SVMP	Snake venom metallopeptidase
74	tr|E9JG34	E9JG34_ECHCS Metalloproteinase	Echis carinatus sochureki	398	456	L.RKDIASPAVCGNEIWEEGEECDCGSPEDCQNPCCEAETCELYPGAVCEDGLCCDKCKFR.T	1.16497e-35	P-III SVMP	Snake venom metallopeptidase
75	tr|E9JG36	E9JG36_ECHCS Metalloproteinase (Fragment)	Echis carinatus sochureki	333	382	A.VVMAHELGHNLGMNHDKSHCKCPVKSCIMSPTARPEPVFSFSDCSWNDYR.S	7.94466e-18	P-III SVMP	Snake venom metallopeptidase
76	tr|E9JG38	E9JG38_ECHCS Metalloproteinase	Echis carinatus sochureki	246	257	N.IRVPLVGLEIWN.Q	1.19027e-05	P-III SVMP	Snake venom metallopeptidase
77	tr|E9JG39	E9JG39_ECHCS Metalloproteinase	Echis carinatus sochureki	112	216	V.THTNWESDEPIKKASPLVATSEQQRSYEKYIELALIADNLIYRKYTGNSTAIKTRMYEIINTLNLVYIVFSIHIALTHIEIWSETDQIKVQSAADDTLHLFGDWR.E	1.37555e-10	P-III SVMP	Snake venom metallopeptidase
78	tr|E9JG41	E9JG41_ECHCS Metalloproteinase	Echis carinatus sochureki	195	293	E.QHSYYDYFRYVKVIVVVDHSMCTKYNNDLTAMRTRVYEMFNTVNEIYIYMHIHVPLVGIEFWCNGDLITVTSSAENTLYSFGDWRASYLLSHKPHDNAQ.L	4.07422e-15	P-III SVMP	Snake venom metallopeptidase
79	tr|E9JG42	E9JG42_ECHCS Metalloproteinase (Fragment)	Echis carinatus sochureki	246	279	N.LRVPLVGMEFWNQRDLINVTSSPKVTLDLFGEWR.E	4.81055e-16	P-III SVMP	Snake venom metallopeptidase
80	tr|E9JG44	E9JG44_ECHCS Metalloproteinase (Fragment)	Echis carinatus sochureki	195	294	E.QHSYYDYFRYVKVIVVVDHSMCTKYNNDLTAMRTRVYEMFNTVNEIYIYMHIHVPLVGIEFWCNGDLITVTSSAENTLYSFGDWRASYLLSHKPHDNAQL.L	5.52113e-10	P-III SVMP	Snake venom metallopeptidase
81	tr|E9JG45	E9JG45_ECHCS Metalloproteinase (Fragment)	Echis carinatus sochureki	7	38	G.MLHDTKSCTCGANPCIMFSEVSEPTPKEFSRC.S	4.78367e-16	P-III SVMP	Snake venom metallopeptidase
82	tr|E9JG52	E9JG52_ECHCS Metalloproteinase	Echis carinatus sochureki	38	71	N.GDLITVTSSAENTLNSFGDWRASDLLSHKTHDNA.Q	2.21973e-14	P-III SVMP	Snake venom metallopeptidase
83	tr|E9JG56	E9JG56_ECHCO Metalloproteinase	Echis coloratus	8	43	A.HEMGHNLGMSHDGNQCNCGANSCIMYPFLSRPLPMY.F	4.33659e-29	P-III SVMP	Snake venom metallopeptidase
84	tr|E9JG64	E9JG64_ECHCO Metalloproteinase	Echis coloratus	173	277	V.THTNWESDEPIKKASPLVATSEQQRSYQKYIELALIADNLIYRKYTGNSTAIKTRMYEIINTLNLVYIVFSIHIALTHIEIWSETDQIKVQSAADDTLHLFGDWR.E	0.00143	P-III SVMP	Snake venom metallopeptidase
85	tr|E9JG75	E9JG75_ECHCO Metalloproteinase	Echis coloratus	315	332	C.QATRSVGVIEDYSPIVRA.V	1.41899e-08	P-III SVMP	Snake venom metallopeptidase
86	tr|E9JG81	E9JG81_ECHCO Metalloproteinase	Echis coloratus	583	611	Q.HKGMVEPGTKCEDGKVCINRKCVDVNTAY.	8.31677e-05	P-III SVMP	Snake venom metallopeptidase
87	tr|E9JGB5	E9JGB5_ECHPL Metalloproteinase (Fragment)	Echis pyramidum leakeyi	333	370	A.VAVTMAHEMGHNLGMYHDGNQCNCGANSCIMYPYISDP.P	4.08418e-07	P-III SVMP	Snake venom metallopeptidase
88	tr|E9JGE9	E9JGE9_ECHCO Metalloproteinase	Echis coloratus	311	333	H.VSSMCQATRSVGVIEDYSPIVRA.V	1.54815e-12	P-III SVMP	Snake venom metallopeptidase
89	tr|E9JGG7	E9JGG7_ECHCS Metalloproteinase (Fragment)	Echis carinatus sochureki	257	279	W.TNGDLINVTSEAEDTLYSFGDWR.A	0.0128	P-III SVMP	Snake venom metallopeptidase
90	tr|E9JGG8	E9JGG8_ECHCS Metalloproteinase (Fragment)	Echis carinatus sochureki	243	276	N.IRVPLVGLEIWNQGDLINVLSSASDTLNSFGEWR.Q	2.82197e-24	P-III SVMP	Snake venom metallopeptidase
91	tr|E9JGH0	E9JGH0_ECHCS Metalloproteinase	Echis carinatus sochureki	17	37	G.SVVELGKMIIQETGKSPFPSY.T	9.37837e-14	PLA2	Phospholipase A2
92	tr|E9JGH1	E9JGH1_ECHCS Metalloproteinase	Echis carinatus sochureki	98	122	R.KNLNTYNKKYTYYPNFWCKGDIEKC.	6.17734e-14	PLA2	Phospholipase A2
93	tr|E9JGH4	E9JGH4_ECHCS Metalloproteinase (Fragment)	Echis carinatus sochureki	19	137	L.MQFETMIKKAAGRSGIWWYGSYGCYCGKGGQGQPQDASDRCCFVHDCCYGRVNGCSPKMDFYRYSEENGDIVCEANNPCTKEICECDKAAAICFRDNINTYDNKYWNVPTESCQESGPC.	4.25587e-06	PLA2	Phospholipase A2
94	tr|E9JGI0	E9JGI0_ECHPL Metalloproteinase	Echis pyramidum leakeyi	82	99	Y.KWENGEIICENSTSCKKR.I	1.15391e-06	PLA2	Phospholipase A2
95	tr|E9KJZ9	E9KJZ9_ECHOC Group III snake venom metalloproteinase	Echis ocellatus	14	137	G.AEGHLSQFGDMINKKTGIFGIMSYIYYGCYCGWGGKGKPLDATDRCCFVHDCCYGRVNGCDPKMGTYSYSFENGDIVCGGDDPCLRAVCECDRVAAICFGENMNTYDKKYMLYSLFDCKEESEQ.C	0.00408	PLA2	Phospholipase A2
96	tr|E9KNB4	E9KNB4_ECHCS Group III snake venom metalloproteinase	Echis carinatus sochureki	255	264	D.DTMDSFGEWR.V	1.98074e-08	PLB	Phospholipase B
97	tr|M9NCG3	M9NCG3_DABRR Glutaminyl-peptide cyclotransferases	Daboia russelii	360	395	D.IPPPLGPLWLLGATFIKQYYIEFDRQNNRIGFATSF.	2.10392e-17	RLAP	Renin-like aspartic protease
98	tr|Q18DC9	Q18DC9_ECHOC Renin-like aspartic protease	Echis ocellatus	251	261	V.DHDHDHHHHHH.P	6.99714e-08	SVMPi	Snake venom metalloprotease inhibitors
99	tr|Q6A3G4	Q6A3G4_VIPAM Ammodytin I1(D) isoform	Vipera ammodytes montandoni	234	258	I.YTKVFDYTDWIHSIIAGNTAATCPS.	0.000214	SVSPs	Snake venom serine proteinase
100	tr|T2HQ57	T2HQ57_OVOOK Amine oxidase	Ovophis okinavensis	180	224	G.GLPAQSRTLCAGILGRRIGSCKGDSGGPLICNGQIQGIVSWGAKV.C	6.14719e-13	SVSPs	Snake venom serine proteinase
101	tr|W8EFS0	W8EFS0_MACLB 5'-nucleotidase (Fragment)	Macrovipera lebetina	180	193	G.RLPAQSRTLCAGIL.	3.87428e-05	SVSPs	Snake venom serine proteinase

[truncated: 8 more sheets: S-10, S-11, S-12, S-13, S-14, S-15, S-16, S-17]
